# Supplementary material for: Whole-exome sequencing identifies a recurrent NAB2-STAT6 fusion in solitary fibrous tumors
Source: Springer Nature journal article supplement (doi:10.1038/ng.2522), 2013-01-13
Supplement: 41588_2013_BFng2522_MOESM24_ESM.pdf [file 41588_2013_BFng2522_MOESM24_ESM.pdf]

## Supplementary Information

### Whole exome sequencing identifies a recurrent *NAB2-STAT6* fusion in solitary fibrous tumors

Juliann Chmielecki,<sup>1,2\*</sup> Aimee M. Crago,<sup>3\*</sup> Mara Rosenberg,<sup>2</sup> Rachael O'Connor,<sup>3</sup> Sarah R. Walker,<sup>1,4,5</sup>  
Lauren Ambrogio,<sup>2</sup> Daniel Auclair,<sup>2</sup> Aaron McKenna,<sup>2</sup> Michael C. Heinrich,<sup>7</sup> David A. Frank,<sup>1,4,5</sup> Matthew  
Meyerson<sup>1,2,6,8</sup>

<sup>1</sup>Department of Medical Oncology, Dana-Farber Cancer Institute, Boston MA 02215 USA

<sup>2</sup> Cancer Program, Broad Institute of Harvard and MIT, Cambridge MA 02143 USA

<sup>3</sup>Sarcoma Biology Laboratory, Department of Surgery, Memorial Sloan-Kettering Cancer Center, New York NY 10065 USA

<sup>4</sup> Department of Medicine, Brigham and Women's Hospital, Boston, MA 02215

<sup>5</sup>Departments of Medicine and <sup>6</sup>Pathology, Harvard Medical School, Boston, MA 02215

<sup>7</sup>Division of Hematology and Medical Oncology, Portland VA Medical Center and OHSU Knight Cancer Institute, Portland OR 97239 USA

\*These authors contributed equally to this work.

<sup>8</sup>To whom correspondence should be addressed: [matthew\\_meyerson@dfci.harvard.edu](mailto:matthew_meyerson@dfci.harvard.edu)

## Supplementary Information

### Supplementary Methods

#### Tumor Collection

Material was collected under IRB-approved protocols at Memorial Sloan-Kettering Cancer Center (New York, NY) and Oregon Health and Science University Biobank (Portland OR). All patients provided informed consent. Cryomolds prepared from tumor specimens were macrodissected, when possible, to minimize contamination by normal and necrotic tissue prior to DNA preparation. Sample processing was carried out in accordance with IRB-approved protocols at the Broad Institute designed to secure samples and minimize identifying information.

#### Whole Exome Sequencing

100 ng of tumor and normal DNA was subjected to shearing, end repair, phosphorylation and ligation to barcoded sequencing adaptors. The ligated DNA was size-selected for fragments between 200-350 bp. These fragments underwent exonic hybrid capture with SureSelect v2 Exome bait (Agilent). The captured DNA was multiplexed and sequenced on multiple Illumina HiSeq flowcells to an average coverage of 98x per sample. Sequence data used for this analysis are available in dbGaP under accession number phs000568.v1.p1.

#### Mutation, Copy Number, and Fusion Analysis

Exome analysis was performed using Broad Institute pipelines.<sup>1-3</sup> The “Firehose” pipeline was used to manage input and output files and submit analyses for execution in GenePattern.<sup>4</sup> In brief, MuTect and MutSig algorithms were used to call somatic mutations and determine their statistical significance, respectively.<sup>5,6</sup> Small somatic insertions and deletions were detected using the Indelocator algorithm after local realignment of tumor and normal sequences. Copy number analysis was performed using the CapSeg for Capture algorithm (McKenna et al., in preparation).<sup>7</sup> The dRanger and BreakPointer algorithms were used to identify somatic fusions and their breakpoints.<sup>3</sup>

## Supplementary Information

### Fusion Analysis and Validation

Genomic fusions were validated with primer sets designed for each unique breakpoint (**see Supplementary Table 5**). For cDNA validation, 50 ng of total RNA was reverse transcribed into cDNA using SuperScript III and random hexamer primers (Invitrogen) according to the manufacturer's instructions. The *NAB2-STAT6* fusion was amplified using 2 independent sets of M13 tagged breakpoint-spanning primers (**see Supplementary Table 5**). *GAPDH* was amplified using cDNA transcribed in the presence (+RT) and absence (-RT) of reverse transcriptase and exon-spanning primers (**see Supplementary Table 5**).

All PCR reactions were performed with HotStarTaq Master Mix (QIAGEN) and standard cycling conditions (95°C for 15m, 35 cycles of 94°C for 30s, 60°C for 30s, 72°C for 1m and final extension at 72°C for 10m). PCR product was confirmed by 1% agarose gel electrophoresis. Excess primers and dNTPS were removed using ExoSAP-IT Reagent (USB Corporation) according to the manufacturer's instructions prior to direct sequencing at GeneWiz.

## Supplementary Information

**Supplementary Figure 1: Mutation rate in SFT. (a)** Total number of mutations identified in each sample sorted by non-synonymous (missense), silent, and dbSNP, out of a median of 29 megabases covered by exome capture. **(b)** The mutation rate across all tumors graphed as mutations per megabase (Mb) of DNA.

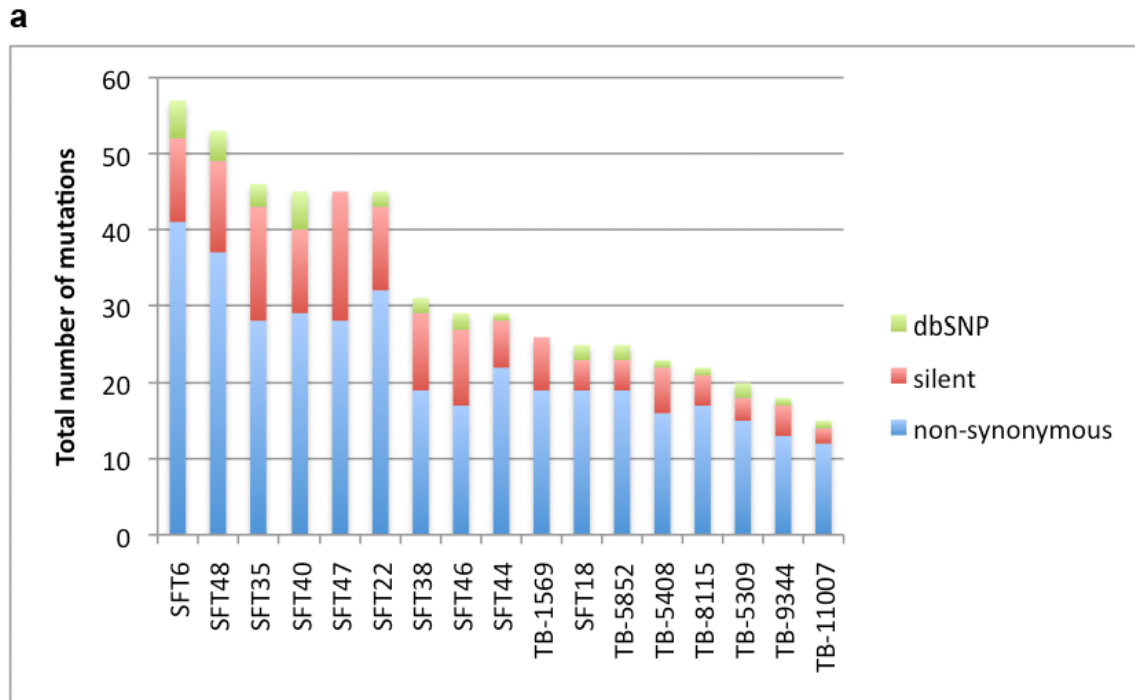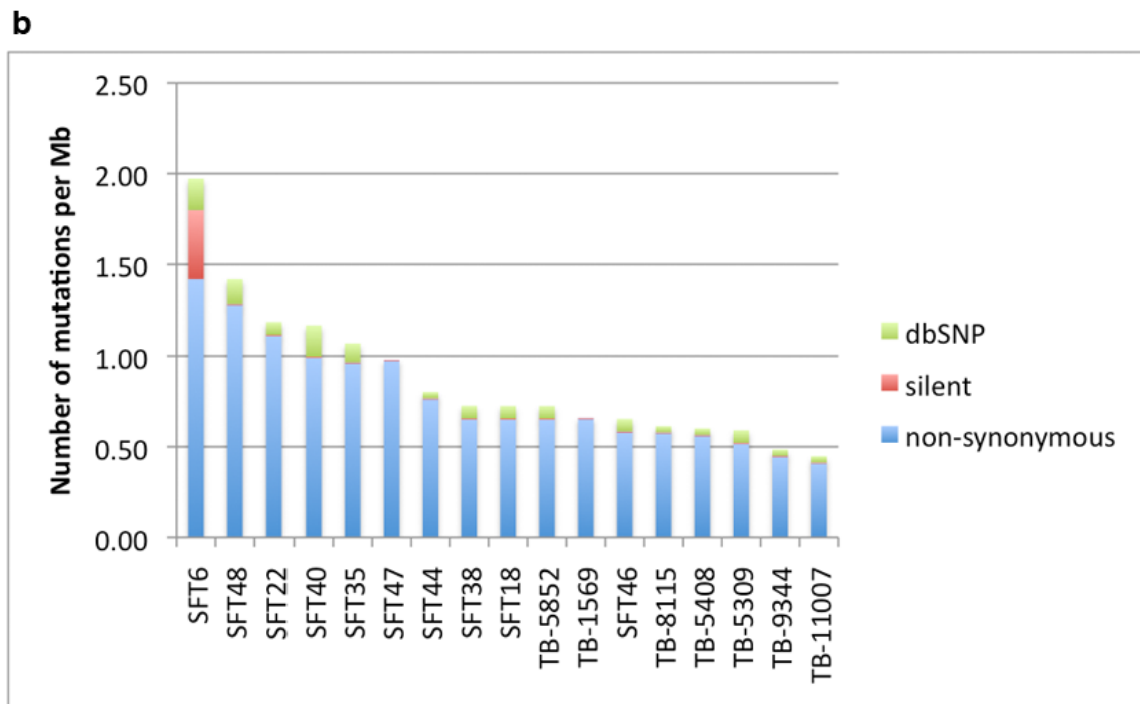

## Supplementary Information

**Supplementary Figure 2: Copy number profiles from whole exome sequencing.** Read counts were converted into segmentation files for display in Integrated Genomics Viewer (IGV). Of note, broad loss of chromosome 13 is observed in 6 samples, and broad amplification of chromosome 8 is observed in 2 samples.

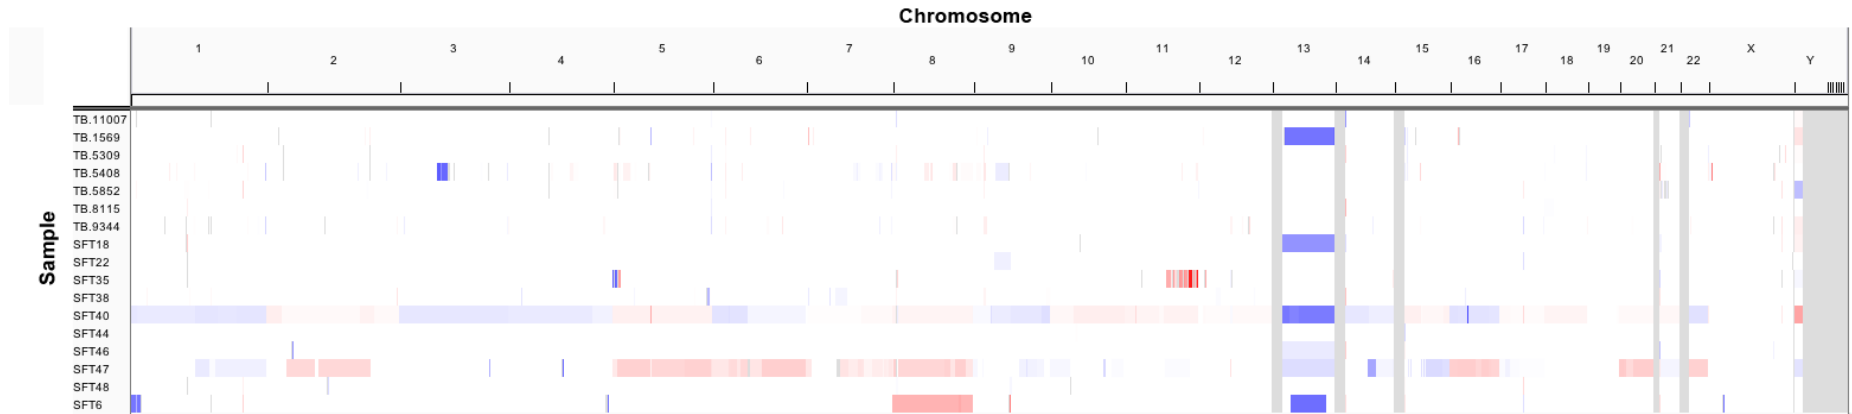

## Supplementary Information

### Supplementary Figure 3: Identification of the *NAB2-STAT6* fusion from whole exome sequencing.

(a) Circos plots showing rearrangements identified from dRanger analysis of whole exome data. The *NAB2-STAT6* inversion is starred (\*). (b) Split screen showing representative mate pairs mapping to different regions of the genome. For context, the bottom panel shows the location of the *STAT6* reads in relation to the transcription start site (blue exons). Dark blue and green sequences correspond to read pairs mapped in the reverse orientation compared to the reference. Gray bars correspond to sequences that align to the reference genome. Mismatched bases (in the case of reads spanning the breakpoint) are indicated by multi-color strips.

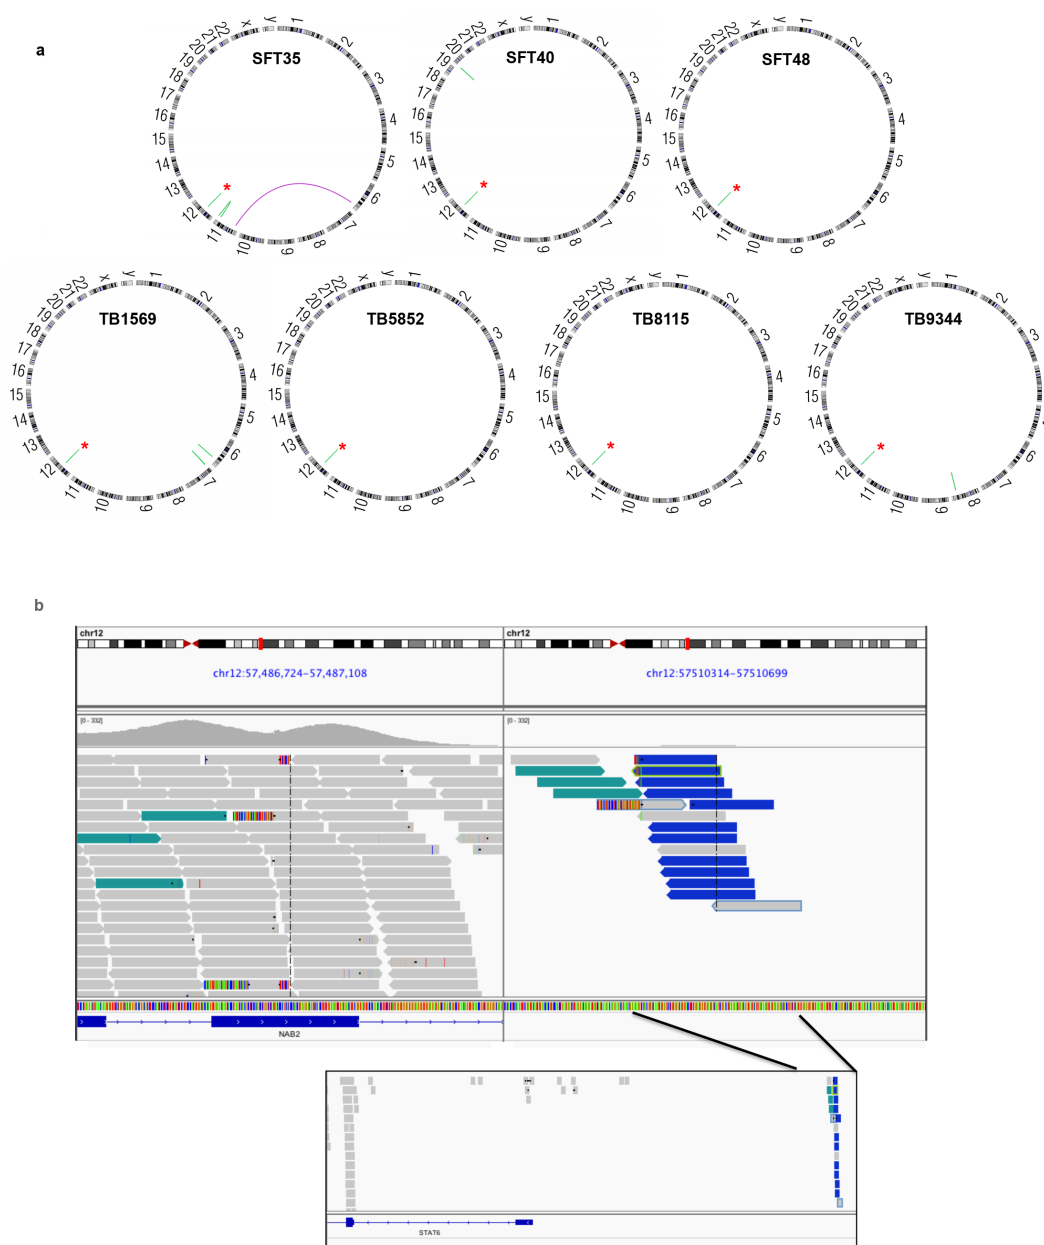

Supplementary Information

**Supplementary Figure 4: Validation of the *NAB2-STAT6* fusion.** (a) Chromatograms showing the genomic sequence of *NAB2-STAT6* in two representative tumors. (b) Representative RT-PCR products and sequencing chromatograms of three *NAB2-STAT6* fusion variants.

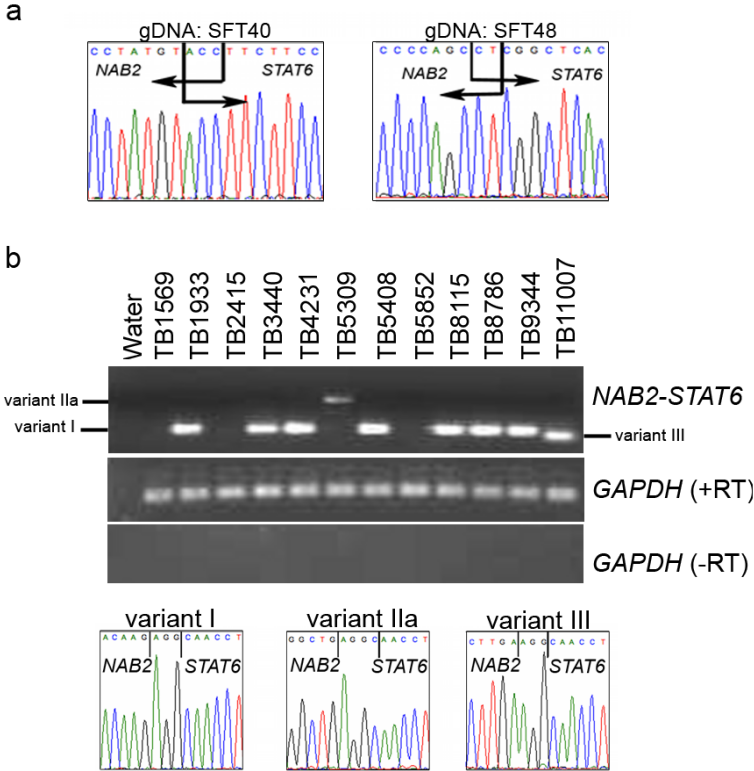

**Supplementary Table 1: Sample and patient characteristics**

| Sample   | Platform   | Age | Gender | Race    | Histology              | Tumor percent | Tumor type | Site      | NAB2-STAT6 Fusion (Variant) |
|----------|------------|-----|--------|---------|------------------------|---------------|------------|-----------|-----------------------------|
| SFT6     | WES/RT-PCR | 70  | Female | unknown | solitary fibrous tumor | 100           | N/A        | pelvis    | Y (variant I)               |
| SFT18    | WES        | 67  | Female | unknown | solitary fibrous tumor | 100           | N/A        | pelvis    | N                           |
| SFT22    | WES/RT-PCR | 55  | Male   | unknown | solitary fibrous tumor | 100           | N/A        | meningeal | N                           |
| SFT35    | WES/RT-PCR | 69  | Female | unknown | solitary fibrous tumor | 100           | N/A        | chest     | Y (variant I)               |
| SFT38    | WES/RT-PCR | 31  | Male   | unknown | solitary fibrous tumor | 100           | N/A        | pelvis    | N                           |
| SFT40-1* | WES/RT-PCR | 70  | Male   | unknown | solitary fibrous tumor | 100           | N/A        | chest     | Y (variant I)               |
| SFT40-2* | RT-PCR     | 70  | Male   | unknown | solitary fibrous tumor | N/A           | N/A        | chest     | Y (variant I)               |
| SFT40-3* | RT-PCR     | 70  | Male   | unknown | solitary fibrous tumor | N/A           | N/A        | chest     | Y (variant I)               |
| SFT40-4* | RT-PCR     | 70  | Male   | unknown | solitary fibrous tumor | N/A           | N/A        | chest     | Y (variant I)               |
| SFT44    | WES/RT-PCR | 29  | Male   | unknown | solitary fibrous tumor | 100           | N/A        | meningeal | N                           |
| SFT46    | WES        | 59  | Female | unknown | solitary fibrous tumor | 100           | N/A        | flank     | N                           |
| SFT47    | WES/RT-PCR | 36  | Male   | unknown | solitary fibrous tumor | 100           | N/A        | meningeal | N                           |
| SFT48-1* | WES/RT-PCR | 81  | Female | unknown | solitary fibrous tumor | 100           | N/A        | chest     | Y (variant I)               |
| SFT48-2* | RT-PCR     | 81  | Female | unknown | solitary fibrous tumor | N/A           | N/A        | chest     | Y (variant I)               |
| SFT8239  | RT-PCR     | 80  | Female | White   | solitary fibrous tumor | N/A           | primary    | extremity | Y (variant I)               |
| SFT8207  | RT-PCR     | 78  | Female | Black   | solitary fibrous tumor | N/A           | primary    | chest     | Y (variant I)               |
| SFT2365  | RT-PCR     | 79  | Male   | White   | solitary fibrous tumor | N/A           | primary    | extremity | N                           |
| SFT2242  | RT-PCR     | 80  | Female | White   | solitary fibrous tumor | N/A           | primary    | pelvis    | Y (variant I)               |
| SFT4558  | RT-PCR     | 59  | Female | White   | solitary fibrous tumor | N/A           | primary    | pelvis    | N                           |
| SFT7096  | RT-PCR     | 50  | Female | White   | solitary fibrous tumor | N/A           | primary    | pelvis    | N                           |
| SFT4338  | RT-PCR     | 58  | Female | White   | solitary fibrous tumor | N/A           | primary    | extremity | N                           |
| SFT5183  | RT-PCR     | 51  | Male   | Indian  | solitary fibrous tumor | N/A           | recurrent  | chest     | Y (variant I)               |
| SFT0295  | RT-PCR     | 35  | Female | White   | solitary fibrous tumor | N/A           | primary    | extremity | Y (variant IIB)             |



|            |            |    |        |          |                        |     |           |                  |                     |
|------------|------------|----|--------|----------|------------------------|-----|-----------|------------------|---------------------|
| SFT2631    | RT-PCR     | 57 | Male   | White    | solitary fibrous tumor | N/A | primary   | chest            | Y (variant I)       |
| SFT0191    | RT-PCR     | 78 | Female | White    | solitary fibrous tumor | N/A | primary   | extremity        | N                   |
| SFT0261    | RT-PCR     | 88 | Male   | White    | solitary fibrous tumor | N/A | primary   | extremity        | N                   |
| SFT5776    | RT-PCR     | 48 | Female | White    | solitary fibrous tumor | N/A | primary   | abdomen          | N                   |
| SFT9821    | RT-PCR     | 50 | Male   | White    | solitary fibrous tumor | N/A | primary   | abdomen          | N                   |
| SFT4566    | RT-PCR     | 44 | Male   | White    | solitary fibrous tumor | N/A | primary   | extremity        | N                   |
| SFT0577-1* | RT-PCR     | 42 | Male   | White    | solitary fibrous tumor | N/A | recurrent | abdomen          | N                   |
| SFT0577-2* | RT-PCR     | 42 | Male   | White    | solitary fibrous tumor | N/A | recurrent | abdomen          | N                   |
| SFT8959    | RT-PCR     | 73 | Female | unknown  | solitary fibrous tumor | N/A | primary   | extremity        | N                   |
| SFT2702    | RT-PCR     | 12 | Male   | White    | solitary fibrous tumor | N/A | primary   | extremity        | N                   |
| SFT7187    | RT-PCR     | 64 | Male   | White    | solitary fibrous tumor | N/A | primary   | extremity        | N                   |
| SFT3612    | RT-PCR     | 63 | Male   | White    | solitary fibrous tumor | N/A | primary   | chest            | N                   |
| SFT8567    | RT-PCR     | 48 | Male   | Black    | solitary fibrous tumor | N/A | primary   | chest            | Y (variant I)       |
| SFT1271    | RT-PCR     | 57 | Male   | Black    | solitary fibrous tumor | N/A | primary   | abdomen          | Y (variant I)       |
| SFT9491    | RT-PCR     | 59 | Female | White    | solitary fibrous tumor | N/A | primary   | flank            | N                   |
| SFT3144    | RT-PCR     | 77 | Male   | White    | solitary fibrous tumor | N/A | primary   | chest            | Y (variant I)       |
| SFT7834    | RT-PCR     | 31 | Male   | White    | solitary fibrous tumor | N/A | primary   | extremity        | Y (variant IV)      |
| SFT1000    | RT-PCR     | 27 | Male   | White    | solitary fibrous tumor | N/A | primary   | pelvis           | N                   |
| TB-1569    | WES/RT-PCR | 42 | Male   | White    | solitary fibrous tumor | 100 | primary   | Prostate, NOS    | Y (variant VI; WES) |
| TB-1933    | RT-PCR     | 46 | Male   | Hispanic | solitary fibrous tumor | 95  | primary   | Lung, NOS        | Y (variant I)       |
| TB-2415    | RT-PCR     | 52 | Female | White    | solitary fibrous tumor | 90  | primary   | Soft tissue, NOS | N                   |
| TB-3440    | RT-PCR     | 75 | Male   | White    | solitary fibrous tumor | 95  | primary   | Pleura           | Y (variant I)       |
| TB-4231    | RT-PCR     | 77 | Male   | White    | solitary fibrous tumor | 100 | primary   | Lung, NOS        | Y (variant I)       |
| TB-5309    | WES/RT-PCR | 45 | Female | White    | solitary fibrous tumor | 100 | primary   | Soft tissue, NOS | Y (variant IIa)     |
| TB-5408    | WES/RT-PCR | 65 | Male   | White    | solitary fibrous tumor | 90  | primary   | Soft tissue, NOS | Y (variant I)       |

|          |            |    |        |         |                        |     |         |                  |                    |
|----------|------------|----|--------|---------|------------------------|-----|---------|------------------|--------------------|
| TB-5852  | WES/RT-PCR | 78 | Male   | Unknown | solitary fibrous tumor | 100 | primary | Peritoneum       | Y (variant V; WES) |
| TB-8115  | WES/RT-PCR | 65 | Female | White   | solitary fibrous tumor | 60  | primary | Soft tissue, NOS | Y (variant I)      |
| TB-8786  | RT-PCR     | 65 | Male   | White   | solitary fibrous tumor | 70  | primary | Lung, NOS        | Y (variant I)      |
| TB-9344  | WES/RT-PCR | 49 | Female | White   | solitary fibrous tumor | 50  | primary | Lung, NOS        | Y (variant I)      |
| TB-11007 | WES/RT-PCR | 54 | Female | White   | solitary fibrous tumor | 90  | primary | Soft tissue, NOS | Y (variant III)    |

NOS: not otherwise specified

WES: whole exome sequencing

RT-PCR: reverse-transcription polymerase chain reaction

N/A: not available

\*Samples from the same patient

**Supplementary Table 2: List of mutated genes in SFT**

| rank | gene     | description                                                                                                                    | Number of bases sequenced | number of non-synonymous mutations | number of patients | number of mutation sites | q-value (False Discovery Rate: Benjamini-Hochberg procedure) |
|------|----------|--------------------------------------------------------------------------------------------------------------------------------|---------------------------|------------------------------------|--------------------|--------------------------|--------------------------------------------------------------|
| 1    | RBPJ     | recombination signal binding protein for immunoglobulin kappa J region                                                         | 26280                     | 2                                  | 2                  | 1                        | 0.0011                                                       |
| 2    | NPEPPS   | aminopeptidase puromycin sensitive                                                                                             | 30597                     | 2                                  | 2                  | 1                        | 0.111                                                        |
| 3    | OR10S1   | olfactory receptor, family 10, subfamily S, member 1                                                                           | 16919                     | 1                                  | 1                  | 1                        | 0.662                                                        |
| 4    | OR56A1   | olfactory receptor, family 56, subfamily A, member 1                                                                           | 16337                     | 1                                  | 1                  | 1                        | 0.662                                                        |
| 5    | OR6K6    | olfactory receptor, family 6, subfamily K, member 6                                                                            | 17612                     | 1                                  | 1                  | 1                        | 0.662                                                        |
| 6    | KLF1     | Kruppel-like factor 1 (erythroid)                                                                                              | 6813                      | 1                                  | 1                  | 1                        | 0.662                                                        |
| 7    | ECD      | ecdysoneless homolog (Drosophila)                                                                                              | 33567                     | 1                                  | 1                  | 1                        | 0.662                                                        |
| 8    | ZNF621   | zinc finger protein 621                                                                                                        | 18906                     | 1                                  | 1                  | 1                        | 0.662                                                        |
| 9    | OR4C16   | olfactory receptor, family 4, subfamily C, member 16                                                                           | 15736                     | 1                                  | 1                  | 1                        | 0.662                                                        |
| 10   | RAB2A    | RAB2A, member RAS oncogene family                                                                                              | 10556                     | 1                                  | 1                  | 1                        | 0.662                                                        |
| 11   | CHRFAM7A | CHRNA7 (cholinergic receptor, nicotinic, alpha 7, exons 5-10) and FAM7A (family with sequence similarity 7A, exons A-E) fusion | 8730                      | 1                                  | 1                  | 1                        | 0.662                                                        |
| 12   | MKRN3    | makorin, ring finger protein, 3                                                                                                | 25531                     | 2                                  | 2                  | 2                        | 0.676                                                        |
| 13   | OR4D6    | olfactory receptor, family 4, subfamily D, member 6                                                                            | 16114                     | 1                                  | 1                  | 1                        | 0.756                                                        |
| 14   | SLAMF1   | signaling lymphocytic activation molecule family member 1                                                                      | 17504                     | 1                                  | 1                  | 1                        | 0.762                                                        |
| 15   | PPP1R1C  | protein phosphatase 1, regulatory (inhibitor) subunit 1C                                                                       | 3655                      | 1                                  | 1                  | 1                        | 0.762                                                        |
| 16   | CNPY4    | canopy 4 homolog (zebrafish)                                                                                                   | 13090                     | 1                                  | 1                  | 1                        | 0.762                                                        |
| 17   | COL1A1   | collagen, type I, alpha 1                                                                                                      | 67078                     | 2                                  | 2                  | 2                        | 0.762                                                        |
| 18   | H1FOO    | H1 histone family, member O, oocyte-specific                                                                                   | 8813                      | 1                                  | 1                  | 1                        | 0.762                                                        |
| 19   | ADH1B    | alcohol dehydrogenase 1B (class I), beta polypeptide                                                                           | 19787                     | 1                                  | 1                  | 1                        | 0.762                                                        |
| 20   | MRGPRX1  | MAS-related GPR, member X1                                                                                                     | 16509                     | 1                                  | 1                  | 1                        | 0.762                                                        |
| 21   | OR4N4    | olfactory receptor, family 4, subfamily N, member 4                                                                            | 16114                     | 1                                  | 1                  | 1                        | 0.762                                                        |
| 22   | RGPD3    | RANBP2-like and GRIP domain containing 3                                                                                       | 53054                     | 2                                  | 2                  | 2                        | 0.762                                                        |
| 23   | DNAJA4   | DnaJ (Hsp40) homolog, subfamily A, member 4                                                                                    | 20650                     | 1                                  | 1                  | 1                        | 0.762                                                        |
| 24   | ANGPT2   | angiopoietin 2                                                                                                                 | 25948                     | 1                                  | 1                  | 1                        | 0.762                                                        |
| 25   | MS4A6E   | membrane-spanning 4-domains, subfamily A, member 6E                                                                            | 7752                      | 1                                  | 1                  | 1                        | 0.762                                                        |
| 26   | STOM     | stomatin                                                                                                                       | 14109                     | 1                                  | 1                  | 1                        | 0.762                                                        |
| 27   | GLYAT    | glycine-N-acyltransferase                                                                                                      | 15553                     | 1                                  | 1                  | 1                        | 0.762                                                        |
| 28   | FGA      | fibrinogen alpha chain                                                                                                         | 44381                     | 1                                  | 1                  | 1                        | 0.762                                                        |
| 29   | POLR3H   | polymerase (RNA) III (DNA directed) polypeptide H (22.9kD)                                                                     | 10797                     | 1                                  | 1                  | 1                        | 0.762                                                        |
| 30   | PRDM12   | PR domain containing 12                                                                                                        | 12588                     | 1                                  | 1                  | 1                        | 0.762                                                        |
| 31   | ULK3     | unc-51-like kinase 3 (C. elegans)                                                                                              | 12519                     | 1                                  | 1                  | 1                        | 0.762                                                        |
| 32   | STX7     | syntaxin 7                                                                                                                     | 13962                     | 1                                  | 1                  | 1                        | 0.762                                                        |
| 33   | MRPL52   | mitochondrial ribosomal protein L52                                                                                            | 6116                      | 1                                  | 1                  | 1                        | 0.762                                                        |
| 34   | SHISA3   | shisa homolog 3 (Xenopus laevis)                                                                                               | 7927                      | 1                                  | 1                  | 1                        | 0.762                                                        |
| 35   | TEX10    | testis expressed 10                                                                                                            | 47600                     | 1                                  | 1                  | 1                        | 0.762                                                        |

|    |          |                                                                                       |        |   |   |   |       |
|----|----------|---------------------------------------------------------------------------------------|--------|---|---|---|-------|
| 36 | KRT26    | keratin 26                                                                            | 24034  | 1 | 1 | 1 | 0.765 |
| 37 | HCFC2    | host cell factor C2                                                                   | 40489  | 2 | 2 | 2 | 0.765 |
| 38 | SH3D19   | SH3 domain containing 19                                                              | 41334  | 1 | 1 | 1 | 0.765 |
| 39 | KCTD5    | potassium channel tetramerisation domain containing 5                                 | 9464   | 1 | 1 | 1 | 0.765 |
| 40 | OR10H3   | olfactory receptor, family 10, subfamily H, member 3                                  | 16201  | 1 | 1 | 1 | 0.765 |
| 41 | TAF1L    | TAF1 RNA polymerase II, TATA box binding protein (TBP)-associated factor, 210kDa-like | 93235  | 2 | 2 | 2 | 0.765 |
| 42 | ST8SIA5  | ST8 alpha-N-acetyl-neuraminide alpha-2,8-sialyltransferase 5                          | 18969  | 1 | 1 | 1 | 0.775 |
| 43 | ACSL3    | acyl-CoA synthetase long-chain family member 3                                        | 37282  | 1 | 1 | 1 | 0.775 |
| 44 | LTB      | lymphotoxin beta (TNF superfamily, member 3)                                          | 9181   | 1 | 1 | 1 | 0.822 |
| 45 | SIRPB2   | signal-regulatory protein beta 2                                                      | 17826  | 1 | 1 | 1 | 0.872 |
| 46 | ZNF208   | zinc finger protein 208                                                               | 60397  | 2 | 2 | 2 | 0.872 |
| 47 | ZNF878   | zinc finger protein 878                                                               | 26178  | 1 | 1 | 1 | 0.897 |
| 48 | SYT14    | synaptotagmin XIV                                                                     | 29040  | 1 | 1 | 1 | 0.897 |
| 49 | PTH2R    | parathyroid hormone 2 receptor                                                        | 28820  | 1 | 1 | 1 | 0.897 |
| 50 | PCDH11Y  | protocadherin 11 Y-linked                                                             | 29162  | 1 | 1 | 1 | 0.897 |
| 51 | ZNF768   | zinc finger protein 768                                                               | 27531  | 1 | 1 | 1 | 0.897 |
| 52 | ZNF727   | zinc finger protein 727                                                               | 8779   | 1 | 1 | 1 | 0.897 |
| 53 | COX7B2   | cytochrome c oxidase subunit VIIb2                                                    | 4248   | 1 | 1 | 1 | 0.905 |
| 54 | KIAA1486 |                                                                                       | 28016  | 2 | 2 | 2 | 0.905 |
| 55 | TIE1     | tyrosine kinase with immunoglobulin-like and EGF-like domains 1                       | 53728  | 1 | 1 | 1 | 0.905 |
| 56 | PERP     | PERP, TP53 apoptosis effector                                                         | 10025  | 1 | 1 | 1 | 0.914 |
| 57 | PJA2     | praja 2, RING-H2 motif containing                                                     | 36649  | 1 | 1 | 1 | 0.958 |
| 58 | ATP7A    | ATPase, Cu <sup>++</sup> transporting, alpha polypeptide (Menkes syndrome)            | 78033  | 1 | 1 | 1 | 0.958 |
| 59 | SETD2    | SET domain containing 2                                                               | 106783 | 2 | 2 | 2 | 0.958 |
| 60 | NANOS3   | nanos homolog 3 (Drosophila)                                                          | 8807   | 1 | 1 | 1 | 0.958 |
| 61 | DHRS4    | dehydrogenase/reductase (SDR family) member 4                                         | 12944  | 1 | 1 | 1 | 0.958 |
| 62 | UNC13B   | unc-13 homolog B (C. elegans)                                                         | 82953  | 1 | 1 | 1 | 0.958 |
| 63 | APBB3    | amyloid beta (A4) precursor protein-binding, family B, member 3                       | 25986  | 1 | 1 | 1 | 0.97  |
| 64 | AKAP12   | A kinase (PRKA) anchor protein (gravin) 12                                            | 87265  | 1 | 1 | 1 | 0.97  |
| 65 | BPIL2    | bactericidal/permeability-increasing protein-like 2                                   | 26608  | 1 | 1 | 1 | 0.97  |
| 66 | CD3G     | CD3g molecule, gamma (CD3-TCR complex)                                                | 8773   | 1 | 1 | 1 | 0.97  |
| 67 | ENC1     | ectodermal-neural cortex (with BTB-like domain)                                       | 30158  | 1 | 1 | 1 | 0.97  |
| 68 | SF3A2    | splicing factor 3a, subunit 2, 66kDa                                                  | 11397  | 1 | 1 | 1 | 0.97  |
| 69 | KIAA1715 | KIAA1715                                                                              | 22270  | 1 | 1 | 1 | 0.97  |
| 70 | CPXM1    | carboxypeptidase X (M14 family), member 1                                             | 32825  | 1 | 1 | 1 | 0.97  |
| 71 | ANXA13   | annexin A13                                                                           | 19074  | 1 | 1 | 1 | 0.97  |
| 72 | EFCAB7   | EF-hand calcium binding domain 7                                                      | 32522  | 1 | 1 | 1 | 0.97  |
| 73 | POTEH    | POTE ankyrin domain family, member H                                                  | 15404  | 1 | 1 | 1 | 0.97  |
| 74 | CALCA    | calcitonin-related polypeptide alpha                                                  | 10234  | 1 | 1 | 1 | 0.97  |
| 75 | ADAMTS1  | ADAM metallopeptidase with thrombospondin type 1 motif, 1                             | 41836  | 1 | 1 | 1 | 0.97  |
| 76 | KIR2DS4  | killer cell immunoglobulin-like receptor, two domains, short cytoplasmic tail, 4      | 11948  | 1 | 1 | 1 | 0.97  |

|     |          |                                                                         |        |   |   |   |       |
|-----|----------|-------------------------------------------------------------------------|--------|---|---|---|-------|
| 77  | FRG1     | FSDH region gene 1                                                      | 13775  | 1 | 1 | 1 | 0.97  |
| 78  | IL28B    | interleukin 28B (interferon, lambda 3)                                  | 8746   | 1 | 1 | 1 | 0.97  |
| 79  | LG11     | leucine-rich, glioma inactivated 1                                      | 28979  | 1 | 1 | 1 | 0.97  |
| 80  | ITLN1    | intelectin 1 (galactofuranose binding)                                  | 16490  | 1 | 1 | 1 | 0.97  |
| 81  | CDH1     | cadherin 1, type 1, E-cadherin (epithelial)                             | 43214  | 1 | 1 | 1 | 0.97  |
| 82  | NKTR     | natural killer-tumor recognition sequence                               | 74865  | 1 | 1 | 1 | 0.985 |
| 83  | KCNJ1    | potassium inwardly-rectifying channel, subfamily J, member 1            | 20127  | 1 | 1 | 1 | 1     |
| 84  | POTEG    | POTE ankyrin domain family, member G                                    | 18487  | 1 | 1 | 1 | 1     |
| 85  | DNAJB6   | DnaJ (Hsp40) homolog, subfamily B, member 6                             | 13304  | 1 | 1 | 1 | 1     |
| 86  | ULK4     | unc-51-like kinase 4 (C. elegans)                                       | 66754  | 1 | 1 | 1 | 1     |
| 87  | RFX6     | regulatory factor X, 6                                                  | 46979  | 1 | 1 | 1 | 1     |
| 88  | ABR      | active BCR-related gene                                                 | 43143  | 1 | 1 | 1 | 1     |
| 89  | MYH4     | myosin, heavy chain 4, skeletal muscle                                  | 101448 | 1 | 1 | 1 | 1     |
| 90  | ZBTB33   | zinc finger and BTB domain containing 33                                | 33994  | 1 | 1 | 1 | 1     |
| 91  | SPPL2B   | signal peptide peptidase like 2B                                        | 19603  | 1 | 1 | 1 | 1     |
| 92  | NRBP1    | nuclear receptor binding protein 1                                      | 28446  | 1 | 1 | 1 | 1     |
| 93  | CWC25    | CWC25 spliceosome-associated protein homolog (S. cerevisiae)            | 18256  | 1 | 1 | 1 | 1     |
| 94  | NBPF9    | neuroblastoma breakpoint family, member 9                               | 43001  | 1 | 1 | 1 | 1     |
| 95  | ST7L     | suppression of tumorigenicity 7 like                                    | 29791  | 1 | 1 | 1 | 1     |
| 96  | ARV1     | ARV1 homolog (S. cerevisiae)                                            | 14083  | 1 | 1 | 1 | 1     |
| 97  | SYNJ2BP  | synaptojanin 2 binding protein                                          | 7718   | 1 | 1 | 1 | 1     |
| 98  | CCNY     | cyclin Y                                                                | 16625  | 1 | 1 | 1 | 1     |
| 99  | TBKBP1   | TBK1 binding protein 1                                                  | 15913  | 1 | 1 | 1 | 1     |
| 100 | PRB2     | proline-rich protein BstNI subfamily 2                                  | 21117  | 1 | 1 | 1 | 1     |
| 101 | RBP1     | retinol binding protein 1, cellular                                     | 7469   | 1 | 1 | 1 | 1     |
| 102 | KIRREL   | kin of IRRE like (Drosophila)                                           | 32866  | 1 | 1 | 1 | 1     |
| 103 | SLC24A1  | solute carrier family 24 (sodium/potassium/calcium exchanger), member 1 | 14613  | 1 | 1 | 1 | 1     |
| 104 | WNT5A    | wingless-type MMTV integration site family, member 5A                   | 14232  | 1 | 1 | 1 | 1     |
| 105 | C12orf53 | chromosome 12 open reading frame 53                                     | 9190   | 1 | 1 | 1 | 1     |
| 106 | NMUR2    | neuromedin U receptor 2                                                 | 21486  | 1 | 1 | 1 | 1     |
| 107 | WNT10B   | wingless-type MMTV integration site family, member 10B                  | 16632  | 1 | 1 | 1 | 1     |
| 108 | TEAD1    | TEA domain family member 1 (SV40 transcriptional enhancer factor)       | 22525  | 1 | 1 | 1 | 1     |
| 109 | LPCAT2   | lysophosphatidylcholine acyltransferase 2                               | 26630  | 1 | 1 | 1 | 1     |
| 110 | TSGA10IP | testis specific, 10 interacting protein                                 | 18369  | 1 | 1 | 1 | 1     |
| 111 | NCL      | nucleolin                                                               | 36584  | 1 | 1 | 1 | 1     |
| 112 | TH1L     | TH1-like (Drosophila)                                                   | 30426  | 1 | 1 | 1 | 1     |
| 113 | C6       | complement component 6                                                  | 48766  | 1 | 1 | 1 | 1     |
| 114 | SCGN     | secretagogin, EF-hand calcium binding protein                           | 14849  | 1 | 1 | 1 | 1     |
| 115 | RNF182   | ring finger protein 182                                                 | 12716  | 1 | 1 | 1 | 1     |
| 116 | GFM1     | G elongation factor, mitochondrial 1                                    | 37908  | 1 | 1 | 1 | 1     |
| 117 | FXR2     | fragile X mental retardation, autosomal homolog 2                       | 24030  | 1 | 1 | 1 | 1     |

|     |           |                                                                                        |        |   |   |   |   |
|-----|-----------|----------------------------------------------------------------------------------------|--------|---|---|---|---|
| 118 | NDUFV2    | NADH dehydrogenase (ubiquinone) flavoprotein 2, 24kDa                                  | 12358  | 1 | 1 | 1 | 1 |
| 119 | PCLO      | piccolo (presynaptic cytomatrix protein)                                               | 244839 | 2 | 2 | 2 | 1 |
| 120 | C20orf72  | chromosome 20 open reading frame 72                                                    | 17865  | 1 | 1 | 1 | 1 |
| 121 | OR2T33    | olfactory receptor, family 2, subfamily T, member 33                                   | 15636  | 1 | 1 | 1 | 1 |
| 122 | HEPHL1    | hephaestin-like 1                                                                      | 54664  | 1 | 1 | 1 | 1 |
| 123 | MYO5C     | myosin VC                                                                              | 90851  | 1 | 1 | 1 | 1 |
| 124 | C10orf118 | chromosome 10 open reading frame 118                                                   | 45663  | 1 | 1 | 1 | 1 |
| 125 | RELL2     | RELT-like 2                                                                            | 15893  | 1 | 1 | 1 | 1 |
| 126 | HOXB2     | homeobox B2                                                                            | 16360  | 1 | 1 | 1 | 1 |
| 127 | EPDR1     | ependymin related protein 1 (zebrafish)                                                | 15122  | 1 | 1 | 1 | 1 |
| 128 | GALT      | galactose-1-phosphate uridylyltransferase                                              | 20126  | 1 | 1 | 1 | 1 |
| 129 | TMEM181   | transmembrane protein 181                                                              | 24661  | 1 | 1 | 1 | 1 |
| 130 | KLHL38    | kelch-like 38 (Drosophila)                                                             | 29880  | 1 | 1 | 1 | 1 |
| 131 | RXFP1     | relaxin/insulin-like family peptide receptor 1                                         | 39737  | 1 | 1 | 1 | 1 |
| 132 | SOAT2     | sterol O-acyltransferase 2                                                             | 22157  | 1 | 1 | 1 | 1 |
| 133 | PCM1      | pericentriolar material 1                                                              | 74140  | 1 | 1 | 1 | 1 |
| 134 | IRS4      | insulin receptor substrate 4                                                           | 63212  | 2 | 2 | 2 | 1 |
| 135 | SLC17A2   | solute carrier family 17 (sodium phosphate), member 2                                  | 22964  | 1 | 1 | 1 | 1 |
| 136 | ZNF845    | zinc finger protein 845                                                                | 48080  | 1 | 1 | 1 | 1 |
| 137 | CAPN5     | calpain 5                                                                              | 29887  | 1 | 1 | 1 | 1 |
| 138 | NDUFS8    | NADH dehydrogenase (ubiquinone) Fe-S protein 8, 23kDa (NADH-coenzyme Q reductase)      | 10392  | 1 | 1 | 1 | 1 |
| 139 | PRSS22    | protease, serine, 22                                                                   | 13729  | 1 | 1 | 1 | 1 |
| 140 | PADI3     | peptidyl arginine deiminase, type III                                                  | 33969  | 1 | 1 | 1 | 1 |
| 141 | TXNDC6    | thioredoxin domain containing 6                                                        | 14039  | 1 | 1 | 1 | 1 |
| 142 | ATP9A     | ATPase, class II, type 9A                                                              | 53527  | 1 | 1 | 1 | 1 |
| 143 | QTRT1     | queuine tRNA-ribosyltransferase 1 (tRNA-guanine transglycosylase)                      | 18722  | 1 | 1 | 1 | 1 |
| 144 | SETX      | senataxin                                                                              | 136141 | 1 | 1 | 1 | 1 |
| 145 | VN1R2     | vomerol nasal 1 receptor 2                                                             | 15771  | 1 | 1 | 1 | 1 |
| 146 | SLC24A2   | solute carrier family 24 (sodium/potassium/calcium exchanger), member 2                | 32941  | 1 | 1 | 1 | 1 |
| 147 | STK39     | serine threonine kinase 39 (STE20/SPS1 homolog, yeast)                                 | 26081  | 1 | 1 | 1 | 1 |
| 148 | IGF2BP1   | insulin-like growth factor 2 mRNA binding protein 1                                    | 29019  | 1 | 1 | 1 | 1 |
| 149 | C12orf66  | chromosome 12 open reading frame 66                                                    | 22897  | 1 | 1 | 1 | 1 |
| 150 | CLSPN     | claspin homolog (Xenopus laevis)                                                       | 68247  | 1 | 1 | 1 | 1 |
| 151 | STX8      | syntaxin 8                                                                             | 11458  | 1 | 1 | 1 | 1 |
| 152 | CTSG      | cathepsin G                                                                            | 13292  | 1 | 1 | 1 | 1 |
| 153 | USP49     | ubiquitin specific peptidase 49                                                        | 30693  | 1 | 1 | 1 | 1 |
| 154 | CDH5      | cadherin 5, type 2, VE-cadherin (vascular epithelium)                                  | 38285  | 1 | 1 | 1 | 1 |
| 155 | ATG3      | ATG3 autophagy related 3 homolog (S. cerevisiae)                                       | 16822  | 1 | 1 | 1 | 1 |
| 156 | ADH1C     | alcohol dehydrogenase 1C (class I), gamma polypeptide                                  | 19601  | 1 | 1 | 1 | 1 |
| 157 | FES       | feline sarcoma oncogene                                                                | 38258  | 1 | 1 | 1 | 1 |
| 158 | B4GALT7   | xylosylprotein beta 1,4-galactosyltransferase, polypeptide 7 (galactosyltransferase I) | 14741  | 1 | 1 | 1 | 1 |
| 159 | ZNF831    | zinc finger protein 831                                                                | 75062  | 1 | 1 | 1 | 1 |

|     |            |                                                                                                               |       |   |   |   |   |
|-----|------------|---------------------------------------------------------------------------------------------------------------|-------|---|---|---|---|
| 160 | TPTE       | transmembrane phosphatase with tensin homology                                                                | 29567 | 1 | 1 | 1 | 1 |
| 161 | DDX4       | DEAD (Asp-Glu-Ala-Asp) box polypeptide 4                                                                      | 38368 | 1 | 1 | 1 | 1 |
| 162 | SFRP2      | secreted frizzled-related protein 2                                                                           | 14515 | 1 | 1 | 1 | 1 |
| 163 | LOC649330  |                                                                                                               | 15062 | 1 | 1 | 1 | 1 |
| 164 | LASS4      | LAG1 homolog, ceramide synthase 4                                                                             | 19269 | 1 | 1 | 1 | 1 |
| 165 | CACNG3     | calcium channel, voltage-dependent, gamma subunit 3                                                           | 16382 | 1 | 1 | 1 | 1 |
| 166 | ZFP42      | zinc finger protein 42 homolog (mouse)                                                                        | 15899 | 1 | 1 | 1 | 1 |
| 167 | C2orf85    |                                                                                                               | 21891 | 1 | 1 | 1 | 1 |
| 168 | DPP4       | dipeptidyl-peptidase 4 (CD26, adenosine deaminase complexing protein 2)                                       | 40862 | 1 | 1 | 1 | 1 |
| 169 | OR8D4      | olfactory receptor, family 8, subfamily D, member 4                                                           | 15977 | 1 | 1 | 1 | 1 |
| 170 | DSG1       | desmoglein 1                                                                                                  | 54563 | 1 | 1 | 1 | 1 |
| 171 | PSMA7      | proteasome (prosome, macropain) subunit, alpha type, 7                                                        | 11987 | 1 | 1 | 1 | 1 |
| 172 | KCNH8      | potassium voltage-gated channel, subfamily H (eag-related), member 8                                          | 57340 | 1 | 1 | 1 | 1 |
| 173 | HIF1AN     | hypoxia-inducible factor 1, alpha subunit inhibitor                                                           | 16837 | 1 | 1 | 1 | 1 |
| 174 | PARM1      | prostate androgen-regulated mucin-like protein 1                                                              | 15574 | 1 | 1 | 1 | 1 |
| 175 | MTMR14     | myotubularin related protein 14                                                                               | 31188 | 1 | 1 | 1 | 1 |
| 176 | SLC45A2    | solute carrier family 45, member 2                                                                            | 27433 | 1 | 1 | 1 | 1 |
| 177 | CCKBR      | cholecystokinin B receptor                                                                                    | 22227 | 1 | 1 | 1 | 1 |
| 178 | LYPD3      | LY6/PLAUR domain containing 3                                                                                 | 17360 | 1 | 1 | 1 | 1 |
| 179 | RPUSD2     | RNA pseudouridylate synthase domain containing 2                                                              | 22797 | 1 | 1 | 1 | 1 |
| 180 | ZNF814     | zinc finger protein 814                                                                                       | 27373 | 1 | 1 | 1 | 1 |
| 181 | OXTR       | oxytocin receptor                                                                                             | 15308 | 1 | 1 | 1 | 1 |
| 182 | PLIN5      | perilipin 5                                                                                                   | 15064 | 1 | 1 | 1 | 1 |
| 183 | VTN        | vitronectin                                                                                                   | 21852 | 1 | 1 | 1 | 1 |
| 184 | ZNF212     | zinc finger protein 212                                                                                       | 24216 | 1 | 1 | 1 | 1 |
| 185 | SLC15A4    | solute carrier family 15, member 4                                                                            | 20811 | 1 | 1 | 1 | 1 |
| 186 | SLC20A1    | solute carrier family 20 (phosphate transporter), member 1                                                    | 35332 | 1 | 1 | 1 | 1 |
| 187 | ST6GALNAC5 | ST6 (alpha-N-acetyl-neuraminyl-2,3-beta-galactosyl-1,3)-N-acetylgalactosaminide alpha-2,6-sialyltransferase 5 | 15728 | 1 | 1 | 1 | 1 |
| 188 | MLXIPL     | MLX interacting protein-like                                                                                  | 25649 | 1 | 1 | 1 | 1 |
| 189 | PRAMEF11   | PRAME family member 11                                                                                        | 20523 | 1 | 1 | 1 | 1 |
| 190 | ANKAR      | ankyrin and armadillo repeat containing                                                                       | 71626 | 1 | 1 | 1 | 1 |
| 191 | OR2L2      | olfactory receptor, family 2, subfamily L, member 2                                                           | 16031 | 2 | 1 | 2 | 1 |
| 192 | BHLHB9     | basic helix-loop-helix domain containing, class B, 9                                                          | 27743 | 1 | 1 | 1 | 1 |
| 193 | USP26      | ubiquitin specific peptidase 26                                                                               | 45964 | 1 | 1 | 1 | 1 |
| 194 | SEMG1      | semenogelin I                                                                                                 | 23741 | 1 | 1 | 1 | 1 |
| 195 | KRT72      | keratin 72                                                                                                    | 22446 | 1 | 1 | 1 | 1 |
| 196 | NFIX       | nuclear factor I/X (CCAAT-binding transcription factor)                                                       | 20420 | 1 | 1 | 1 | 1 |
| 197 | CRY2       | cryptochrome 2 (photolyase-like)                                                                              | 29104 | 1 | 1 | 1 | 1 |
| 198 | KLF10      | Kruppel-like factor 10                                                                                        | 24803 | 1 | 1 | 1 | 1 |
| 199 | MAN2B1     | mannosidase, alpha, class 2B, member 1                                                                        | 46174 | 1 | 1 | 1 | 1 |
| 200 | OR10H1     | olfactory receptor, family 10, subfamily H, member 1                                                          | 16047 | 1 | 1 | 1 | 1 |

|     |          |                                                                                           |        |   |   |   |   |
|-----|----------|-------------------------------------------------------------------------------------------|--------|---|---|---|---|
| 201 | ERC1     | ELKS/RAB6-interacting/CAST family member 1                                                | 57964  | 1 | 1 | 1 | 1 |
| 202 | BRSK1    | BR serine/threonine kinase 1                                                              | 31494  | 1 | 1 | 1 | 1 |
| 203 | G3BP1    | GTPase activating protein (SH3 domain) binding protein 1                                  | 24439  | 1 | 1 | 1 | 1 |
| 204 | CHD7     | chromodomain helicase DNA binding protein 7                                               | 129479 | 2 | 2 | 2 | 1 |
| 205 | ARMCX3   | armadillo repeat containing, X-linked 3                                                   | 19416  | 1 | 1 | 1 | 1 |
| 206 | BBOX1    | butyrobetaine (gamma), 2-oxoglutarate dioxygenase (gamma-butyrobetaine hydroxylase) 1     | 19367  | 1 | 1 | 1 | 1 |
| 207 | GOT1L1   | glutamic-oxaloacetic transaminase 1-like 1                                                | 16174  | 1 | 1 | 1 | 1 |
| 208 | LPPR4    |                                                                                           | 35520  | 1 | 1 | 1 | 1 |
| 209 | AJAP1    | adherens junctions associated protein 1                                                   | 15898  | 1 | 1 | 1 | 1 |
| 210 | UTY      | ubiquitously transcribed tetratricopeptide repeat gene, Y-linked                          | 26452  | 1 | 1 | 1 | 1 |
| 211 | PDE3A    | phosphodiesterase 3A, cGMP-inhibited                                                      | 52620  | 1 | 1 | 1 | 1 |
| 212 | SLC22A10 | solute carrier family 22, member 10                                                       | 28292  | 1 | 1 | 1 | 1 |
| 213 | LRRK2    | leucine-rich repeat kinase 2                                                              | 130463 | 1 | 1 | 1 | 1 |
| 214 | TTC30A   | tetratricopeptide repeat domain 30A                                                       | 30258  | 1 | 1 | 1 | 1 |
| 215 | KCNN2    | potassium intermediate/small conductance calcium-activated channel, subfamily N, member 2 | 27351  | 1 | 1 | 1 | 1 |
| 216 | SLC12A3  | solute carrier family 12 (sodium/chloride transporters), member 3                         | 49891  | 1 | 1 | 1 | 1 |
| 217 | CCDC96   | coiled-coil domain containing 96                                                          | 23401  | 1 | 1 | 1 | 1 |
| 218 | DMRT1    | doublesex and mab-3 related transcription factor 1                                        | 14852  | 1 | 1 | 1 | 1 |
| 219 | BLNK     | B-cell linker                                                                             | 24371  | 1 | 1 | 1 | 1 |
| 220 | ALPP     | alkaline phosphatase, placental (Regan isozyme)                                           | 23705  | 1 | 1 | 1 | 1 |
| 221 | MTPAP    | mitochondrial poly(A) polymerase                                                          | 29743  | 1 | 1 | 1 | 1 |
| 222 | SHOC2    | soc-2 suppressor of clear homolog (C. elegans)                                            | 29485  | 1 | 1 | 1 | 1 |
| 223 | VARS2    | valyl-tRNA synthetase 2, mitochondrial (putative)                                         | 50981  | 1 | 1 | 1 | 1 |
| 224 | SCTR     | secretin receptor                                                                         | 21943  | 1 | 1 | 1 | 1 |
| 225 | PLD4     | phospholipase D family, member 4                                                          | 15204  | 1 | 1 | 1 | 1 |
| 226 | SIRT7    | sirtuin (silent mating type information regulation 2 homolog) 7 (S. cerevisiae)           | 15949  | 1 | 1 | 1 | 1 |
| 227 | SAGE1    | sarcoma antigen 1                                                                         | 46815  | 1 | 1 | 1 | 1 |
| 228 | CAPN12   | calpain 12                                                                                | 28190  | 1 | 1 | 1 | 1 |
| 229 | WAC      | WW domain containing adaptor with coiled-coil                                             | 32579  | 1 | 1 | 1 | 1 |
| 230 | CBL      | Cas-Br-M (murine) ecotropic retroviral transforming sequence                              | 44189  | 1 | 1 | 1 | 1 |
| 231 | BDH1     | 3-hydroxybutyrate dehydrogenase, type 1                                                   | 17951  | 1 | 1 | 1 | 1 |
| 232 | CNTN5    | contactin 5                                                                               | 52486  | 1 | 1 | 1 | 1 |
| 233 | ARHGAP10 | Rho GTPase activating protein 10                                                          | 40955  | 1 | 1 | 1 | 1 |
| 234 | ZFYVE1   | zinc finger, FYVE domain containing 1                                                     | 40398  | 1 | 1 | 1 | 1 |
| 235 | DCLK3    | doublecortin-like kinase 3                                                                | 33367  | 1 | 1 | 1 | 1 |
| 236 | KIAA1009 | KIAA1009                                                                                  | 50328  | 1 | 1 | 1 | 1 |



|     |          |                                                                                |        |   |   |   |   |
|-----|----------|--------------------------------------------------------------------------------|--------|---|---|---|---|
| 237 | XIRP2    | xin actin-binding repeat containing 2                                          | 206254 | 1 | 1 | 1 | 1 |
| 238 | ZNF107   | zinc finger protein 107                                                        | 39980  | 1 | 1 | 1 | 1 |
| 239 | ARSI     | arylsulfatase family, member I                                                 | 26421  | 1 | 1 | 1 | 1 |
| 240 | GPR112   | G protein-coupled receptor 112                                                 | 157641 | 1 | 1 | 1 | 1 |
| 241 | GOLGA2   | golgi autoantigen, golgin subfamily a, 2                                       | 47807  | 1 | 1 | 1 | 1 |
| 242 | PACSIN1  | protein kinase C and casein kinase substrate in neurons 1                      | 19165  | 1 | 1 | 1 | 1 |
| 243 | ALDOA    | aldolase A, fructose-bisphosphate                                              | 19151  | 1 | 1 | 1 | 1 |
| 244 | TTC7A    | tetratricopeptide repeat domain 7A                                             | 41313  | 1 | 1 | 1 | 1 |
| 245 | FXR1     | fragile X mental retardation, autosomal homolog 1                              | 32377  | 1 | 1 | 1 | 1 |
| 246 | ERN1     | endoplasmic reticulum to nucleus signaling 1                                   | 38983  | 1 | 1 | 1 | 1 |
| 247 | HUNK     | hormonally upregulated Neu-associated kinase                                   | 34942  | 1 | 1 | 1 | 1 |
| 248 | SUPT16H  | suppressor of Ty 16 homolog ( <i>S. cerevisiae</i> )                           | 54722  | 1 | 1 | 1 | 1 |
| 249 | APLNR    | apelin receptor                                                                | 18410  | 1 | 1 | 1 | 1 |
| 250 | WNT4     | wingless-type MMTV integration site family, member 4                           | 16634  | 1 | 1 | 1 | 1 |
| 251 | LAMB3    | laminin, beta 3                                                                | 59579  | 1 | 1 | 1 | 1 |
| 252 | CYFIP1   | cytoplasmic FMR1 interacting protein 1                                         | 66370  | 1 | 1 | 1 | 1 |
| 253 | SV2B     | synaptic vesicle glycoprotein 2B                                               | 35689  | 1 | 1 | 1 | 1 |
| 254 | ESYT2    | extended synaptotagmin-like protein 2                                          | 39467  | 1 | 1 | 1 | 1 |
| 255 | EFCAB5   | EF-hand calcium binding domain 5                                               | 64021  | 1 | 1 | 1 | 1 |
| 256 | ZNF609   | zinc finger protein 609                                                        | 72209  | 1 | 1 | 1 | 1 |
| 257 | RBM15    | RNA binding motif protein 15                                                   | 49501  | 1 | 1 | 1 | 1 |
| 258 | SHPK     | sedoheptulokinase                                                              | 23485  | 1 | 1 | 1 | 1 |
| 259 | ZSWIM1   | zinc finger, SWIM-type containing 1                                            | 24854  | 1 | 1 | 1 | 1 |
| 260 | GDPD4    | glycerophosphodiester phosphodiesterase domain containing 4                    | 27372  | 1 | 1 | 1 | 1 |
| 261 | ANLN     | anillin, actin binding protein                                                 | 58189  | 1 | 1 | 1 | 1 |
| 262 | KIF2B    | kinesin family member 2B                                                       | 34442  | 1 | 1 | 1 | 1 |
| 263 | NAB1     | NGFI-A binding protein 1 (EGR1 binding protein 1)                              | 25305  | 1 | 1 | 1 | 1 |
| 264 | FAM83G   | family with sequence similarity 83, member G                                   | 37568  | 1 | 1 | 1 | 1 |
| 265 | CNNM1    | cyclin M1                                                                      | 29404  | 1 | 1 | 1 | 1 |
| 266 | ZNF2     | zinc finger protein 2                                                          | 22005  | 1 | 1 | 1 | 1 |
| 267 | FAM155A  | family with sequence similarity 155, member A                                  | 21867  | 1 | 1 | 1 | 1 |
| 268 | MAPT     | microtubule-associated protein tau                                             | 34436  | 1 | 1 | 1 | 1 |
| 269 | ENGASE   | endo-beta-N-acetylglucosaminidase                                              | 36250  | 1 | 1 | 1 | 1 |
| 270 | TLE3     | transducin-like enhancer of split 3 (E(sp1) homolog, <i>Drosophila</i> )       | 30434  | 1 | 1 | 1 | 1 |
| 271 | XIRP1    | xin actin-binding repeat containing 1                                          | 93975  | 1 | 1 | 1 | 1 |
| 272 | LILRA4   | leukocyte immunoglobulin-like receptor, subfamily A (with TM domain), member 4 | 26024  | 1 | 1 | 1 | 1 |
| 273 | HEXA     | hexosaminidase A (alpha polypeptide)                                           | 27959  | 1 | 1 | 1 | 1 |
| 274 | TRMT1    | TRM1 tRNA methyltransferase 1 homolog ( <i>S. cerevisiae</i> )                 | 31694  | 1 | 1 | 1 | 1 |
| 275 | ATL2     | atlastin GTPase 2                                                              | 29743  | 1 | 1 | 1 | 1 |
| 276 | APBA1    | amyloid beta (A4) precursor protein-binding, family A, member 1 (X11)          | 37610  | 1 | 1 | 1 | 1 |
| 277 | KIAA1751 | KIAA1751                                                                       | 38023  | 1 | 1 | 1 | 1 |
| 278 | TBR1     | T-box, brain, 1                                                                | 26447  | 1 | 1 | 1 | 1 |

|     |          |                                                                    |        |   |   |   |   |
|-----|----------|--------------------------------------------------------------------|--------|---|---|---|---|
| 279 | A1CF     | APOBEC1 complementation factor                                     | 33216  | 1 | 1 | 1 | 1 |
| 280 | DSG3     | desmoglein 3 (pemphigus vulgaris antigen)                          | 52039  | 1 | 1 | 1 | 1 |
| 281 | RGNEF    | Rho guanine nucleotide exchange factor (GEF) 28                    | 59244  | 1 | 1 | 1 | 1 |
| 282 | MUC17    | mucin 17, cell surface associated                                  | 229998 | 2 | 2 | 2 | 1 |
| 283 | GRIN1    | glutamate receptor, ionotropic, N-methyl D-aspartate 1             | 37982  | 1 | 1 | 1 | 1 |
| 284 | CLCA4    | chloride channel, calcium activated, family member 4               | 47472  | 1 | 1 | 1 | 1 |
| 285 | ABCA4    | ATP-binding cassette, sub-family A (ABC1), member 4                | 116359 | 1 | 1 | 1 | 1 |
| 286 | VPS13B   | vacuolar protein sorting 13 homolog B (yeast)                      | 207395 | 1 | 1 | 1 | 1 |
| 287 | TRPV5    | transient receptor potential cation channel, subfamily V, member 5 | 38156  | 1 | 1 | 1 | 1 |
| 288 | UBE3C    | ubiquitin protein ligase E3C                                       | 56077  | 1 | 1 | 1 | 1 |
| 289 | NPHP3    | nephronophthisis 3 (adolescent)                                    | 68225  | 1 | 1 | 1 | 1 |
| 290 | DLG5     | discs, large homolog 5 (Drosophila)                                | 90419  | 1 | 1 | 1 | 1 |
| 291 | HEATR7B2 | HEAT repeat family member 7B2                                      | 68829  | 1 | 1 | 1 | 1 |
| 292 | RP1      | retinitis pigmentosa 1 (autosomal dominant)                        | 109704 | 1 | 1 | 1 | 1 |
| 293 | GABBR2   | gamma-aminobutyric acid (GABA) B receptor, 2                       | 43608  | 1 | 1 | 1 | 1 |
| 294 | AVIL     | advillin                                                           | 42847  | 1 | 1 | 1 | 1 |
| 295 | ABI3BP   | ABI gene family, member 3 (NESH) binding protein                   | 44229  | 1 | 1 | 1 | 1 |
| 296 | BRDT     | bromodomain, testis-specific                                       | 49076  | 1 | 1 | 1 | 1 |
| 297 | STK31    | serine/threonine kinase 31                                         | 53606  | 1 | 1 | 1 | 1 |
| 298 | PTPRZ1   | protein tyrosine phosphatase, receptor-type, Z polypeptide 1       | 119327 | 1 | 1 | 1 | 1 |
| 299 | PTK2     | PTK2 protein tyrosine kinase 2                                     | 54458  | 1 | 1 | 1 | 1 |
| 300 | MTHFD1L  | methylenetetrahydrofolate dehydrogenase (NADP+ dependent) 1-like   | 47203  | 1 | 1 | 1 | 1 |
| 301 | USP16    | ubiquitin specific peptidase 16                                    | 43048  | 1 | 1 | 1 | 1 |
| 302 | ZFP28    | zinc finger protein 28 homolog (mouse)                             | 41344  | 1 | 1 | 1 | 1 |
| 303 | TSC2     | tuberous sclerosis 2                                               | 79832  | 1 | 1 | 1 | 1 |
| 304 | GSN      | gelsolin (amyloidosis, Finnish type)                               | 34635  | 1 | 1 | 1 | 1 |
| 305 | LRRC66   | leucine rich repeat containing 66                                  | 44825  | 1 | 1 | 1 | 1 |
| 306 | CDON     | Cdon homolog (mouse)                                               | 65132  | 1 | 1 | 1 | 1 |
| 307 | ITIH2    | inter-alpha (globulin) inhibitor H2                                | 49441  | 1 | 1 | 1 | 1 |
| 308 | MMRN1    | multimerin 1                                                       | 62571  | 1 | 1 | 1 | 1 |
| 309 | GLDC     | glycine dehydrogenase (decarboxylating)                            | 49715  | 1 | 1 | 1 | 1 |
| 310 | DIS3     | DIS3 mitotic control homolog (S. cerevisiae)                       | 46191  | 1 | 1 | 1 | 1 |
| 311 | DTX3L    | deltex 3-like (Drosophila)                                         | 37947  | 1 | 1 | 1 | 1 |
| 312 | INPP5D   | inositol polyphosphate-5-phosphatase, 145kDa                       | 42919  | 1 | 1 | 1 | 1 |
| 313 | AMPD1    | adenosine monophosphate deaminase 1 (isoform M)                    | 40660  | 1 | 1 | 1 | 1 |
| 314 | KLHL14   | kelch-like 14 (Drosophila)                                         | 31498  | 1 | 1 | 1 | 1 |
| 315 | ZDBF2    | zinc finger, DBF-type containing 2                                 | 110814 | 1 | 1 | 1 | 1 |
| 316 | EEA1     | early endosome antigen 1                                           | 70193  | 1 | 1 | 1 | 1 |
| 317 | COL4A1   | collagen, type IV, alpha 1                                         | 81953  | 1 | 1 | 1 | 1 |
| 318 | TP63     | tumor protein p63                                                  | 38202  | 1 | 1 | 1 | 1 |
| 319 | KIF24    | kinesin family member 24                                           | 65421  | 1 | 1 | 1 | 1 |

|     |          |                                                                                                          |        |   |   |   |   |
|-----|----------|----------------------------------------------------------------------------------------------------------|--------|---|---|---|---|
| 320 | FLT1     | fms-related tyrosine kinase 1 (vascular endothelial growth factor/vascular permeability factor receptor) | 69854  | 1 | 1 | 1 | 1 |
| 321 | ZEB1     | zinc finger E-box binding homeobox 1                                                                     | 56304  | 1 | 1 | 1 | 1 |
| 322 | ZC3H11A  | zinc finger CCCH-type containing 11A                                                                     | 41666  | 1 | 1 | 1 | 1 |
| 323 | FLG      | filaggrin                                                                                                | 197966 | 1 | 1 | 1 | 1 |
| 324 | CHD2     | chromodomain helicase DNA binding protein 2                                                              | 95315  | 1 | 1 | 1 | 1 |
| 325 | ITGAD    | integrin, alpha D                                                                                        | 59654  | 1 | 1 | 1 | 1 |
| 326 | VEPH1    | ventricular zone expressed PH domain homolog 1 (zebrafish)                                               | 45078  | 1 | 1 | 1 | 1 |
| 327 | AZI1     | 5-azacytidine induced 1                                                                                  | 39902  | 1 | 1 | 1 | 1 |
| 328 | NLRP11   | NLR family, pyrin domain containing 11                                                                   | 53331  | 1 | 1 | 1 | 1 |
| 329 | PDZRN4   | PDZ domain containing RING finger 4                                                                      | 45578  | 1 | 1 | 1 | 1 |
| 330 | BAI3     | brain-specific angiogenesis inhibitor 3                                                                  | 79225  | 1 | 1 | 1 | 1 |
| 331 | CLIP1    | CAP-GLY domain containing linker protein 1                                                               | 72221  | 1 | 1 | 1 | 1 |
| 332 | TUBGCP3  | tubulin, gamma complex associated protein 3                                                              | 46114  | 1 | 1 | 1 | 1 |
| 333 | PCDHAC2  | protocadherin alpha subfamily C, 2                                                                       | 48634  | 1 | 1 | 1 | 1 |
| 334 | SMC2     | structural maintenance of chromosomes 2                                                                  | 61418  | 1 | 1 | 1 | 1 |
| 335 | PTPRT    | protein tyrosine phosphatase, receptor type, T                                                           | 73658  | 1 | 1 | 1 | 1 |
| 336 | CNTN2    | contactin 2 (axonal)                                                                                     | 53770  | 1 | 1 | 1 | 1 |
| 337 | FRYL     | FRY-like                                                                                                 | 155866 | 1 | 1 | 1 | 1 |
| 338 | TNIK     | TRAF2 and NCK interacting kinase                                                                         | 56319  | 1 | 1 | 1 | 1 |
| 339 | CCDC135  | coiled-coil domain containing 135                                                                        | 45238  | 1 | 1 | 1 | 1 |
| 340 | BSN      | bassoon (presynaptic cytomatrix protein)                                                                 | 183006 | 1 | 1 | 1 | 1 |
| 341 | MUC4     | mucin 4, cell surface associated                                                                         | 52611  | 1 | 1 | 1 | 1 |
| 342 | C2orf71  | chromosome 2 open reading frame 71                                                                       | 64051  | 1 | 1 | 1 | 1 |
| 343 | PTPRN2   | protein tyrosine phosphatase, receptor type, N polypeptide 2                                             | 40736  | 1 | 1 | 1 | 1 |
| 344 | TPP2     | tripeptidyl peptidase II                                                                                 | 64636  | 1 | 1 | 1 | 1 |
| 345 | DGKD     | diacylglycerol kinase, delta 130kDa                                                                      | 61085  | 1 | 1 | 1 | 1 |
| 346 | TRIP12   | thyroid hormone receptor interactor 12                                                                   | 103887 | 1 | 1 | 1 | 1 |
| 347 | DNMBP    | dynamamin binding protein                                                                                | 79694  | 1 | 1 | 1 | 1 |
| 348 | DCHS2    | dachsous 2 (Drosophila)                                                                                  | 145982 | 1 | 1 | 1 | 1 |
| 349 | BRCA2    | breast cancer 2, early onset                                                                             | 171366 | 1 | 1 | 1 | 1 |
| 350 | KIAA1462 | KIAA1462                                                                                                 | 69335  | 1 | 1 | 1 | 1 |
| 351 | MYO16    | myosin XVI                                                                                               | 85270  | 1 | 1 | 1 | 1 |
| 352 | ATF7IP   | activating transcription factor 7 interacting protein                                                    | 65707  | 1 | 1 | 1 | 1 |
| 353 | GPR158   | G protein-coupled receptor 158                                                                           | 59245  | 1 | 1 | 1 | 1 |
| 354 | DNAH17   | dynein, axonemal, heavy chain 17                                                                         | 190115 | 1 | 1 | 1 | 1 |
| 355 | IKBKAP   | inhibitor of kappa light polypeptide gene enhancer in B-cells, kinase complex-associated protein         | 69989  | 1 | 1 | 1 | 1 |
| 356 | DOPEY1   | dopey family member 1                                                                                    | 126835 | 1 | 1 | 1 | 1 |
| 357 | KIAA1432 | KIAA1432                                                                                                 | 71442  | 1 | 1 | 1 | 1 |
| 358 | KDM5C    | lysine (K)-specific demethylase 5C                                                                       | 65353  | 1 | 1 | 1 | 1 |
| 359 | ODZ1     | odz, odd Oz/ten-m homolog 1(Drosophila)                                                                  | 140067 | 1 | 1 | 1 | 1 |
| 360 | RUSC2    | RUN and SH3 domain containing 2                                                                          | 72728  | 1 | 1 | 1 | 1 |

|     |          |                                                                      |         |   |   |   |   |
|-----|----------|----------------------------------------------------------------------|---------|---|---|---|---|
| 361 | SCN4A    | sodium channel, voltage-gated, type IV, alpha subunit                | 82440   | 1 | 1 | 1 | 1 |
| 362 | MAGI1    | membrane associated guanylate kinase, WW and PDZ domain containing 1 | 79990   | 1 | 1 | 1 | 1 |
| 363 | DIP2B    | DIP2 disco-interacting protein 2 homolog B ( <i>Drosophila</i> )     | 80092   | 1 | 1 | 1 | 1 |
| 364 | USP34    | ubiquitin specific peptidase 34                                      | 184844  | 1 | 1 | 1 | 1 |
| 365 | ZCCHC6   | zinc finger, CCHC domain containing 6                                | 77694   | 1 | 1 | 1 | 1 |
| 366 | KIAA1549 | KIAA1549                                                             | 77355   | 1 | 1 | 1 | 1 |
| 367 | DSCAM    | Down syndrome cell adhesion molecule                                 | 103994  | 1 | 1 | 1 | 1 |
| 368 | ATM      | ataxia telangiectasia mutated                                        | 158086  | 1 | 1 | 1 | 1 |
| 369 | NIN      | ninein (GSK3B interacting protein)                                   | 105623  | 1 | 1 | 1 | 1 |
| 370 | MYO7A    | myosin VIIA                                                          | 70293   | 1 | 1 | 1 | 1 |
| 371 | FRMPD1   | FERM and PDZ domain containing 1                                     | 80557   | 1 | 1 | 1 | 1 |
| 372 | DLC1     | deleted in liver cancer 1                                            | 80280   | 1 | 1 | 1 | 1 |
| 373 | FLG2     | filaggrin family member 2                                            | 121915  | 1 | 1 | 1 | 1 |
| 374 | DNAH1    | dynein, axonemal, heavy chain 1                                      | 173852  | 1 | 1 | 1 | 1 |
| 375 | DNAJC13  | DnaJ (Hsp40) homolog, subfamily C, member 13                         | 117659  | 1 | 1 | 1 | 1 |
| 376 | MDC1     | mediator of DNA damage checkpoint 1                                  | 107450  | 1 | 1 | 1 | 1 |
| 377 | PRIC285  | helicase with zinc finger 2, transcriptional coactivator             | 69588   | 1 | 1 | 1 | 1 |
| 378 | SPG11    | spastic paraplegia 11 (autosomal recessive)                          | 122178  | 1 | 1 | 1 | 1 |
| 379 | ZFP106   | zinc finger protein 106 homolog (mouse)                              | 95426   | 1 | 1 | 1 | 1 |
| 380 | MUC16    | mucin 16, cell surface associated                                    | 731508  | 2 | 2 | 2 | 1 |
| 381 | VPS13A   | vacuolar protein sorting 13 homolog A ( <i>S. cerevisiae</i> )       | 164018  | 1 | 1 | 1 | 1 |
| 382 | ZNF462   | zinc finger protein 462                                              | 128257  | 1 | 1 | 1 | 1 |
| 383 | MLL3     | myeloid/lymphoid or mixed-lineage leukemia 3                         | 250804  | 1 | 1 | 1 | 1 |
| 384 | WNK1     | WNK lysine deficient protein kinase 1                                | 139076  | 1 | 1 | 1 | 1 |
| 385 | APOB     | apolipoprotein B (including Ag(x) antigen)                           | 231999  | 1 | 1 | 1 | 1 |
| 386 | ZFX3     | zinc finger homeobox 3                                               | 187990  | 1 | 1 | 1 | 1 |
| 387 | SACS     | spastic ataxia of Charlevoix-Saguenay (sacsin)                       | 226799  | 1 | 1 | 1 | 1 |
| 388 | TTN      | titin                                                                | 1803345 | 3 | 2 | 3 | 1 |
| 389 | ELN      | elastin (supravalvular aortic stenosis, Williams-Beuren syndrome)    | 37045   | 1 | 1 | 1 | 1 |
| 390 | FAM47C   | family with sequence similarity 47, member C                         | 51987   | 1 | 1 | 1 | 1 |

**Supplementary Table 3: All mutations identified from whole exome sequencing**

| Hugo_Symbol | Entrez_Gene_Id | NCBI_Build | Genome_Change        | Strand | Exon | cDNA_Change | Protein_Change | mutant allele fraction |
|-------------|----------------|------------|----------------------|--------|------|-------------|----------------|------------------------|
| EFCAB7      | 84455          | 37         | g.chr1:64027506A>G   | +      | 11   | c.1475A>G   | p.N492S        | 0.394737               |
| CLCA4       | 22802          | 37         | g.chr1:87040355G>C   | +      | 10   | c.1600G>C   | p.D534H        | 0.353535               |
| ECD         | 11319          | 37         | g.chr10:74914127G>A  | -      | 6    | c.670C>T    | p.R224C        | 0.069767               |
| AVIL        | 10677          | 37         | g.chr12:58207181G>C  | -      | 3    | c.167C>G    | p.S56C         | 0.336735               |
| NIN         | 51199          | 37         | g.chr14:51224340T>A  | -      | 18   | c.3408A>T   | p.E1136D       | 0.480392               |
| TLE3        | 7090           | 37         | g.chr15:70347550C>G  | -      | 15   | c.1425G>C   | p.R475S        | 0.336066               |
| DNAJA4      | 55466          | 37         | g.chr15:78565494C>T  | +      | 3    | c.371C>T    | p.T124M        | 0.026786               |
| CACNG3      | 10368          | 37         | g.chr16:24268200C>A  | +      | 1    | c.125C>A    | p.T42N         | 0.434783               |
| KRT33A      | 3883           | 37         | g.chr17:39503421G>A  | -      | 4    | c.642C>T    | p.D214D        | 0.466667               |
| IL28B       | 282617         | 37         | g.chr19:39735130T>A  | -      | 2    | c.185A>T    | p.E62V         | 0.5                    |
| TTN         | 7273           | 37         | g.chr2:179496965C>T  | -      | 185  | c.35952G>A  | p.S11984S      | 0.409091               |
| DSCAM       | 1826           | 37         | g.chr21:41719750T>G  | -      | 6    | c.1057A>C   | p.I353L        | 0.018519               |
| BPIL2       | 254240         | 37         | g.chr22:32833754T>C  | -      | 7    | c.740A>G    | p.N247S        | 0.083333               |
| FXR1        | 8087           | 37         | g.chr3:180666171T>A  | +      | 5    | c.307T>A    | p.Y103N        | 0.4                    |
| ARSI        | 340075         | 37         | g.chr5:149677490G>C  | -      | 2    | c.997C>G    | p.L333V        | 0.305085               |
| FGFR4       | 2264           | 37         | g.chr5:176517801G>A  | +      | 4    | c.411G>A    | p.S137S        | 0.06383                |
| PERP        | 64065          | 37         | g.chr6:138428332C>T  | -      | 1    | c.146G>A    | p.W49*         | 0.340206               |
| FAM120B     | 84498          | 37         | g.chr6:170697401G>A  | +      | 7    | c.2310G>A   | p.V770V        | 0.459459               |
| MUC17       | 140453         | 37         | g.chr7:100677815G>T  | +      | 3    | c.3118G>T   | p.G1040*       | 0.396522               |
| PCM1        | 5108           | 37         | g.chr8:17817906A>G   | +      | 15   | c.2275A>G   | p.I759V        | 0.157895               |
| OR1L6       | 392390         | 37         | g.chr9:125512246G>A  | +      | 1    | c.228G>A    | p.A76A         | 0.369369               |
| KIAA1751    | 85452          | 37         | g.chr1:1896472G>A    | -      | 13   | c.1430C>T   | p.P477L        | 0.434783               |
| STXBP3      | 6814           | 37         | g.chr1:109315427A>G  | +      | 7    | c.579A>G    | p.G193G        | 0.451613               |
| FLG2        | 388698         | 37         | g.chr1:152327287G>A  | -      | 3    | c.2975C>T   | p.S992F        | 0.411609               |
| SHOC2       | 8036           | 37         | g.chr10:112764464A>G | +      | 5    | c.1073A>G   | p.Y358C        | 0.528302               |
| OR56A1      | 120796         | 37         | g.chr11:6048549C>T   | -      | 1    | c.386G>A    | p.R129H        | 0.518519               |
| MRGPRX1     | 259249         | 37         | g.chr11:18955977C>T  | -      | 1    | c.355G>A    | p.E119K        | 0.089552               |
| NDUFS8      | 4728           | 37         | g.chr11:67803835A>T  | +      | 6    | c.488A>T    | p.D163V        | 0.090909               |
| ATF7IP      | 55729          | 37         | g.chr12:14613491C>A  | +      | 9    | c.2221C>A   | p.P741T        | 0.419753               |
| SYT10       | 341359         | 37         | g.chr12:33560240A>G  | -      | 3    | c.561T>C    | p.V187V        | 0.5                    |
| B4GALNT1    | 2583           | 37         | g.chr12:58020596G>A  | -      | 11   | c.1533C>T   | p.D511D        | 0.453333               |
| ALDOA       | 226            | 37         | g.chr16:30078965G>T  | +      | 6    | c.307G>T    | p.G103C        | 0.415842               |
| ITGAD       | 3681           | 37         | g.chr16:31427573G>A  | +      | 19   | c.2323G>A   | p.E775K        | 0.130435               |
| MYH1        | 4619           | 37         | g.chr17:10404916A>G  | -      | 26   | c.3343T>C   | p.L1115L       | 0.272727               |
| VTN         | 7448           | 37         | g.chr17:26696624C>T  | -      | 3    | c.433G>A    | p.G145R        | 0.432432               |
| AZI1        | 22994          | 37         | g.chr17:79171522G>C  | -      | 13   | c.1646C>G   | p.S549C        | 0.633333               |
| QTRT1       | 81890          | 37         | g.chr19:10822873G>A  | +      | 6    | c.683G>A    | p.G228E        | 0.153846               |
| VN1R2       | 317701         | 37         | g.chr19:53762302C>T  | +      | 1    | c.674C>T    | p.A225V        | 0.368421               |
| ZNF548      | 147694         | 37         | g.chr19:57910567C>T  | +      | 3    | c.912C>T    | p.T304T        | 0.064935               |
| WDR35       | 57539          | 37         | g.chr2:20113391G>A   | -      | 28   | c.3474C>T   | p.C1158C       | 0.425676               |
| ZNF2        | 7549           | 37         | g.chr2:95847570C>G   | +      | 6    | c.994C>G    | p.Q332E        | 0.414634               |
| POTEE       | 445582         | 37         | g.chr2:131976473G>T  | +      | 1    | c.498G>T    | p.V166V        | 0.269841               |
| TTN         | 7273           | 37         | g.chr2:179415852A>G  | -      | 285  | c.83702T>C  | p.V27901A      | 0.210526               |
| TTN         | 7273           | 37         | g.chr2:179456935T>G  | -      | 251  | c.51992A>C  | p.K17331T      | 0.5                    |
| NAB1        | 4664           | 37         | g.chr2:191524666T>A  | +      | 4    | c.764T>A    | p.I255K        | 0.4                    |
| DNAJC13     | 23317          | 37         | g.chr3:132247149G>A  | +      | 54   | c.6498G>A   | p.M2166I       | 0.489362               |
| RBP1        | 5947           | 37         | g.chr3:139257681A>C  | -      | 2    | c.380T>G    | p.F127C        | 0.576271               |
| TIPARP      | 25976          | 37         | g.chr3:156422578A>G  | +      | 6    | c.1632A>G   | p.K544K        | 0.02381                |
| COX7B2      | 170712         | 37         | g.chr4:46737214G>C   | -      | 3    | c.-4C>G     |                | 0.533333               |
| FGA         | 2243           | 37         | g.chr4:155510705T>C  | -      | 2    | c.64A>G     | p.S22G         | 0.408602               |
| PCDHA13     | 56136          | 37         | g.chr5:140263167G>A  | +      | 1    | c.1314G>A   | p.T438T        | 0.505                  |

|          |        |    |                      |   |    |            |          |          |
|----------|--------|----|----------------------|---|----|------------|----------|----------|
| PACSIN1  | 29993  | 37 | g.chr6:34497291C>G   | + | 5  | c.574C>G   | p.Q192E  | 0.478261 |
| ABP1     | 26     | 37 | g.chr7:150554014C>T  | + | 3  | c.456C>T   | p.Y152Y  | 0.465753 |
| KIAA1432 | 57589  | 37 | g.chr9:5765734G>T    | + | 20 | c.2836G>T  | p.V946F  | 0.098901 |
| PIGO     | 84720  | 37 | g.chr9:35095515G>A   | - | 2  | c.48C>T    | p.L16L   | 0.3      |
| FRMPD1   | 22844  | 37 | g.chr9:37745019A>T   | + | 16 | c.2990A>T  | p.D997V  | 0.102804 |
| GSN      | 2934   | 37 | g.chr9:124073030G>C  | + | 4  | c.573G>C   | p.Q191H  | 0.418605 |
| ABCA4    | 24     | 37 | g.chr1:94510206G>C   | - | 20 | c.3013C>G  | p.L1005V | 0.057692 |
| BBOX1    | 8424   | 37 | g.chr11:27114810C>T  | + | 5  | c.430C>T   | p.L144F  | 0.144737 |
| CNTN5    | 53942  | 37 | g.chr11:100211267G>A | + | 22 | c.2803G>A  | p.V935I  | 0.360465 |
| ERC1     | 23085  | 37 | g.chr12:1225169G>C   | + | 7  | c.1539G>C  | p.K513N  | 0.078431 |
| FGF23    | 8074   | 37 | g.chr12:4479524G>A   | - | 3  | c.741C>T   | p.F247F  | 0.041958 |
| DIP2B    | 57609  | 37 | g.chr12:51084865G>A  | + | 13 | c.1585G>A  | p.V529I  | 0.041667 |
| EP400    | 57634  | 37 | g.chr12:132547141G>A | + | 46 | c.8229G>A  | p.Q2743Q | 0.068182 |
| EDNRB    | 1910   | 37 | g.chr13:78492690G>A  | - | 1  | c.19C>T    | p.L7L    | 0.571429 |
| COL4A1   | 1282   | 37 | g.chr13:110850913G>A | - | 21 | c.1186C>T  | p.R396*  | 0.085714 |
| OR6S1    | 341799 | 37 | g.chr14:21109524G>A  | - | 1  | c.327C>T   | p.L109L  | 0.297872 |
| CTSG     | 1511   | 37 | g.chr14:25043946G>A  | - | 3  | c.274C>T   | p.R92C   | 0.46789  |
| SYNJ2BP  | 55333  | 37 | g.chr14:70842452C>T  | - | 3  | c.238G>A   | p.D80N   | 0.319527 |
| ANGEL1   | 23357  | 37 | g.chr14:77275802A>G  | - | 2  | c.249T>C   | p.D83D   | 0.322034 |
| ISM2     | 145501 | 37 | g.chr14:77951125G>A  | - | 2  | c.279C>T   | p.N93N   | 0.586207 |
| NDUFV2   | 4729   | 37 | g.chr18:9117858A>G   | + | 2  | c.77A>G    | p.H26R   | 0.508197 |
| ZNF208   | 7757   | 37 | g.chr19:22155114C>T  | - | 5  | c.2422G>A  | p.E808K  | 0.04878  |
| ZNF578   | 147660 | 37 | g.chr19:53014555A>G  | + | 6  | c.921A>G   | p.R307R  | 0.027273 |
| NRBP1    | 29959  | 37 | g.chr2:27663547G>C   | + | 14 | c.1171G>C  | p.D391H  | 0.146341 |
| 5-Mar    | 57574  | 37 | g.chr2:217124215G>A  | - | 4  | c.1053C>T  | p.T351T  | 0.151515 |
| INPP5D   | 3635   | 37 | g.chr2:234106829C>T  | + | 24 | c.2782C>T  | p.H928Y  | 0.458333 |
| DGKD     | 8527   | 37 | g.chr2:234365940G>A  | + | 21 | c.2546G>A  | p.G849E  | 0.528455 |
| ATP9A    | 10079  | 37 | g.chr20:50217835G>C  | - | 28 | c.3059C>G  | p.T1020S | 0.113208 |
| USP16    | 10600  | 37 | g.chr21:30411818G>A  | + | 9  | c.880G>A   | p.G294S  | 0.041096 |
| MAG11    | 9223   | 37 | g.chr3:65349205T>C   | - | 21 | c.3430A>G  | p.N1144D | 0.497409 |
| FBXO40   | 51725  | 37 | g.chr3:121345691T>C  | + | 4  | c.2064T>C  | p.R688R  | 0.168831 |
| COL6A6   | 131873 | 37 | g.chr3:130286027G>A  | + | 4  | c.1764G>A  | p.K588K  | 0.092784 |
| BDH1     | 622    | 37 | g.chr3:197239185G>A  | - | 8  | c.613C>T   | p.R205C  | 0.064516 |
| UGT2B10  | 7365   | 37 | g.chr4:69874742G>A   | - | 8  | c.1029C>T  | p.Y343Y  | 0.393443 |
| SFRP2    | 6423   | 37 | g.chr4:154702697C>T  | - | 3  | c.794G>A   | p.G265D  | 0.083333 |
| ZFP42    | 132625 | 37 | g.chr4:188924770C>T  | + | 3  | c.809C>T   | p.T270M  | 0.065217 |
| C6       | 729    | 37 | g.chr5:41199992C>T   | - | 4  | c.323G>A   | p.R108H  | 0.096154 |
| PCDHB11  | 56125  | 37 | g.chr5:140579656G>C  | + | 1  | c.309G>C   | p.V103V  | 0.147887 |
| PCDHGA11 | 56105  | 37 | g.chr5:140803155G>A  | + | 1  | c.2361G>A  | p.E787E  | 0.115385 |
| SCGN     | 10590  | 37 | g.chr6:25665223G>A   | + | 4  | c.299G>A   | p.R100Q  | 0.430233 |
| MDC1     | 9656   | 37 | g.chr6:30672779C>T   | - | 10 | c.4181G>A  | p.G1394E | 0.477876 |
| SUN3     | 256979 | 37 | g.chr7:48046845G>A   | - | 6  | c.409C>T   | p.L137L  | 0.086207 |
| ESYT2    | 57488  | 37 | g.chr7:158590695C>T  | - | 3  | c.589G>A   | p.V197M  | 0.474576 |
| SLC24A2  | 25769  | 37 | g.chr9:19550157G>A   | - | 7  | c.1457C>T  | p.T486M  | 0.478632 |
| ARID3C   | 138715 | 37 | g.chr9:34623522G>A   | - | 4  | c.765C>T   | p.A255A  | 0.595238 |
| IRS4     | 8471   | 37 | g.chrX:107975971G>A  | - | 1  | c.3604C>T  | p.Q1202* | 0.504274 |
| TREX2    | 11219  | 37 | g.chrX:152710673G>A  | - | 3  | c.342C>T   | p.A114A  | 0.5      |
| ABCA4    | 24     | 37 | g.chr1:94495088A>G   | - | 30 | c.4452T>C  | p.P1484P | 0.340426 |
| CELSR2   | 1952   | 37 | g.chr1:109795590C>A  | + | 1  | c.2889C>A  | p.G963G  | 0.021505 |
| TEDDM1   | 127670 | 37 | g.chr1:182369318T>C  | - | 1  | c.303A>G   | p.K101K  | 0.016575 |
| SPHAR    | 10638  | 37 | g.chr1:229440926T>C  | + | 1  | c.45T>C    | p.F15F   | 0.4      |
| KCNJ1    | 3758   | 37 | g.chr11:128709968C>G | - | 2  | c.228G>C   | p.K76N   | 0.030151 |
| KRT86    | 3892   | 37 | g.chr12:52698770C>T  | + | 5  | c.694C>T   | p.L232L  | 0.016461 |
| RYR3     | 6263   | 37 | g.chr15:34102757G>T  | + | 71 | c.10104G>T | p.V3368V | 0.347826 |
| ZNF768   | 79724  | 37 | g.chr16:30536074C>T  | - | 2  | c.1387G>A  | p.G463S  | 0.4      |

|          |           |    |                      |   |    |             |             |          |
|----------|-----------|----|----------------------|---|----|-------------|-------------|----------|
| GAS8     | 2622      | 37 | g.chr16:90102871G>A  | + | 6  | c.633G>A    | p.V211V     | 0.076923 |
| MYH4     | 4622      | 37 | g.chr17:10355460C>T  | - | 27 | c.3536G>A   | p.R1179H    | 0.269461 |
| DNAH17   | 8632      | 37 | g.chr17:76557907G>C  | - | 8  | c.831C>G    | p.I277M     | 0.263158 |
| DSG3     | 1830      | 37 | g.chr18:29041305G>A  | + | 8  | c.929G>A    | p.G310E     | 0.186047 |
| MUC16    | 94025     | 37 | g.chr19:9086870G>A   | - | 1  | c.4945C>T   | p.H1649Y    | 0.282051 |
| USP34    | 9736      | 37 | g.chr2:61577486C>T   | - | 12 | c.1416G>A   | p.W472*     | 0.283582 |
| TRIP12   | 9320      | 37 | g.chr2:230643633C>T  | - | 34 | c.4943G>A   | p.G1648D    | 0.049261 |
| POTEH    | 23784     | 37 | g.chr22:16287673C>G  | - | 1  | c.213G>C    | p.W71C      | 0.011521 |
| TRIOBP   | 11078     | 37 | g.chr22:38120282C>T  | + | 7  | c.1719C>T   | p.D573D     | 0.022346 |
| OTUD4    | 54726     | 37 | g.chr4:146059041A>G  | - | 21 | c.2691T>C   | p.H897H     | 0.016304 |
| PRDM9    | 56979     | 37 | g.chr5:23527609T>C   | + | 11 | c.2412T>C   | p.Y804Y     | 0.016    |
| SLC45A2  | 51151     | 37 | g.chr5:33951767C>T   | - | 5  | c.1048G>A   | p.D350N     | 0.042328 |
| DDX4     | 54514     | 37 | g.chr5:55063731T>A   | + | 7  | c.357T>A    | p.D119E     | 0.350877 |
| MUC17    | 140453    | 37 | g.chr7:100681244A>G  | + | 3  | c.6547A>G   | p.T2183A    | 0.01105  |
| MLL3     | 58508     | 37 | g.chr7:151877852T>C  | - | 36 | c.7093A>G   | p.T2365A    | 0.253333 |
| GALT     | 2592      | 37 | g.chr9:34650400A>G   | + | 11 | c.1094A>G   | p.H365R     | 0.316456 |
| ZNF462   | 58499     | 37 | g.chr9:109690558C>T  | + | 3  | c.4365C>T   | p.S1455S    | 0.277778 |
| USP26    | 83844     | 37 | g.chrX:132162055C>G  | - | 6  | c.194G>C    | p.R65T      | 0.538462 |
| TSPAN2   | 10100     | 37 | g.chr1:115603103A>T  | - | 4  | c.327T>A    | p.A109A     | 0.08     |
| GPR158   | 57512     | 37 | g.chr10:25886855G>A  | + | 11 | c.2300G>A   | p.R767Q     | 0.292683 |
| CCNY     | 219771    | 37 | g.chr10:35841999A>G  | + | 8  | c.632A>G    | p.N211S     | 0.172662 |
| APLNR    | 187       | 37 | g.chr11:57003773G>A  | - | 1  | c.706C>T    | p.R236C     | 0.430556 |
| SLC22A10 | 387775    | 37 | g.chr11:63069907C>T  | + | 7  | c.1177C>T   | p.R393*     | 0.260417 |
| OR10S1   | 219873    | 37 | g.chr11:123848223A>G | - | 1  | c.176T>C    | p.L59P      | 0.3      |
| IRAK3    | 11213     | 37 | g.chr12:66638958C>T  | + | 11 | c.1230C>T   | p.C410C     | 0.574074 |
| FLT1     | 2321      | 37 | g.chr13:28964124C>T  | - | 13 | c.1778G>A   | p.R593Q     | 0.435897 |
| MKRN3    | 7681      | 37 | g.chr15:23812328G>A  | + | 1  | c.1399G>A   | p.V467M     | 0.470588 |
| PLCB2    | 5330      | 37 | g.chr15:40587177A>G  | - | 18 | c.1866T>C   | p.N622N     | 0.210145 |
| HEXA     | 3073      | 37 | g.chr15:72640429C>T  | - | 9  | c.1033G>A   | p.G345S     | 0.314815 |
| FES      | 2242      | 37 | g.chr15:91428301G>T  | + | 2  | c.26G>T     | p.S9I       | 0.187135 |
| SV2B     | 9899      | 37 | g.chr15:91835642G>A  | + | 12 | c.1912G>A   | p.A638T     | 0.449541 |
| A2BP1    | 54715     | 37 | g.chr16:7645598G>A   | + | 8  | c.516G>A    | p.A172A     | 0.630573 |
| EEF2K    | 29904     | 37 | g.chr16:22278158G>A  | + | 15 | c.1725G>A   | p.S575S     | 0.03125  |
| COG4     | 25839     | 37 | g.chr16:70515295G>A  | - | 18 | c.2202C>T   | p.L734L     | 0.020942 |
| EFCAB5   | 374786    | 37 | g.chr17:28407910A>T  | + | 17 | c.3337A>T   | p.M1113L    | 0.163934 |
| KRTAP4-7 | 100132476 | 37 | g.chr17:39240908T>C  | + | 1  | c.450T>C    | p.C150C     | 0.1875   |
| KLHL14   | 57565     | 37 | g.chr18:30350035C>T  | - | 2  | c.520G>A    | p.V174M     | 0.215385 |
| DAZAP1   | 26528     | 37 | g.chr19:1418703G>A   | + | 4  | c.276G>A    | p.P92P      | 0.022472 |
| KIR2DS4  | 3809      | 37 | g.chr19:55349057G>A  | + | 3  | c.97G>A     | p.A33T      | 0.503067 |
| STK39    | 27347     | 37 | g.chr2:169020276T>C  | - | 4  | c.545A>G    | p.Y182C     | 0.048387 |
| GTF3C3   | 9330      | 37 | g.chr2:197637807G>A  | - | 14 | c.1902C>T   | p.Y634Y     | 0.433962 |
| ZDBF2    | 57683     | 37 | g.chr2:207172481G>T  | + | 5  | c.3229G>T   | p.D1077Y    | 0.454545 |
| SRMS     | 6725      | 37 | g.chr20:62172255C>T  | - | 8  | c.1383G>A   | p.E461E     | 0.248677 |
| PRIC285  | 85441     | 37 | g.chr20:62195106G>A  | - | 9  | c.5069C>T   | p.A1690V    | 0.5      |
| RTEL1    | 51750     | 37 | g.chr20:62293950G>A  | + | 5  | c.447G>A    | p.E149E     | 0.431818 |
| DGKG     | 1608      | 37 | g.chr3:186015857G>A  | - | 4  | c.306C>T    | p.S102S     | 0.144444 |
| TP63     | 8626      | 37 | g.chr3:189526314C>T  | + | 4  | c.578C>T    | p.T193M     | 0.213333 |
| SHISA3   | 152573    | 37 | g.chr4:42400217C>G   | + | 1  | c.144C>G    | p.F48L      | 0.666667 |
| ADH1C    | 126       | 37 | g.chr4:100269004C>G  | - | 2  | c.19_splice | p.V7_splice | 0.380952 |
| RGNEF    | 64283     | 37 | g.chr5:73090232A>G   | + | 7  | c.916A>G    | p.K306E     | 0.25     |
| KIAA0240 | 23506     | 37 | g.chr6:42796293T>C   | + | 6  | c.222T>C    | p.D74D      | 0.320755 |
| TMEM181  | 57583     | 37 | g.chr6:158957795C>T  | + | 1  | c.317C>T    | p.P106L     | 0.347826 |
| ZNF727   | 442319    | 37 | g.chr7:63538806C>G   | + | 4  | c.1379C>G   | p.T460S     | 0.125    |
| DNAJB6   | 10049     | 37 | g.chr7:157177656T>C  | + | 7  | c.574T>C    | p.S192P     | 0.196429 |
| PTPRN2   | 5799      | 37 | g.chr7:157959907C>T  | - | 6  | c.626G>A    | p.R209Q     | 0.197531 |

|         |        |    |                      |   |    |            |          |          |
|---------|--------|----|----------------------|---|----|------------|----------|----------|
| DMRT1   | 1761   | 37 | g.chr9:916850G>A     | + | 4  | c.910G>A   | p.V304M  | 0.240741 |
| ITLN1   | 55600  | 37 | g.chr1:160849139A>G  | - | 7  | c.751T>C   | p.C251R  | 0.066116 |
| CNTN2   | 6900   | 37 | g.chr1:205033545C>A  | + | 11 | c.1336C>A  | p.P446T  | 0.265537 |
| OR2L2   | 26246  | 37 | g.chr1:248201585C>G  | + | 1  | c.16C>G    | p.Q6E    | 0.323529 |
| OR2L2   | 26246  | 37 | g.chr1:248202383A>G  | + | 1  | c.814A>G   | p.I272V  | 0.348837 |
| A1CF    | 29974  | 37 | g.chr10:52587939A>T  | - | 7  | c.721T>A   | p.S241T  | 0.302326 |
| LCOR    | 84458  | 37 | g.chr10:98715043T>A  | + | 8  | c.666T>A   | p.P222P  | 0.380952 |
| TEAD1   | 7003   | 37 | g.chr11:12785877G>A  | + | 3  | c.53G>A    | p.G18E   | 0.381579 |
| LRRK2   | 120892 | 37 | g.chr12:40697802G>A  | + | 27 | c.3643G>A  | p.A1215T | 0.490566 |
| BRCA2   | 675    | 37 | g.chr13:32913996A>G  | + | 11 | c.5504A>G  | p.N1835S | 0.333333 |
| DIS3    | 22894  | 37 | g.chr13:73346364T>G  | - | 10 | c.1436A>C  | p.D479A  | 0.365854 |
| TPP2    | 7174   | 37 | g.chr13:103257200G>T | + | 2  | c.223G>T   | p.D75Y   | 0.02521  |
| SPG11   | 80208  | 37 | g.chr15:44890837T>A  | - | 22 | c.3884A>T  | p.E1295V | 0.407895 |
| KCTD5   | 54442  | 37 | g.chr16:2747985G>A   | + | 3  | c.440G>A   | p.S147N  | 0.09375  |
| ZFHX3   | 463    | 37 | g.chr16:72821615G>A  | - | 10 | c.10560C>T | p.G3520G | 0.192308 |
| SCN4A   | 6329   | 37 | g.chr17:62038591T>G  | - | 11 | c.1807A>C  | p.T603P  | 0.3      |
| TTC7A   | 57217  | 37 | g.chr2:47250580G>A   | + | 13 | c.1544G>A  | p.R515Q  | 0.461538 |
| MYO1B   | 4430   | 37 | g.chr2:192275800A>G  | + | 27 | c.2775A>G  | p.K925K  | 0.4      |
| HUNK    | 30811  | 37 | g.chr21:33297002G>A  | + | 2  | c.484G>A   | p.E162K  | 0.336735 |
| UGT2B15 | 7366   | 37 | g.chr4:69512918C>A   | - | 6  | c.1497G>T  | p.L499L  | 0.352    |
| PARM1   | 25849  | 37 | g.chr4:75937784G>T   | + | 2  | c.193G>T   | p.V65L   | 0.377049 |
| NMUR2   | 56923  | 37 | g.chr5:151784196C>T  | - | 1  | c.479G>A   | p.R160Q  | 0.422222 |
| ABCBS   | 340273 | 37 | g.chr7:20683156G>T   | + | 7  | c.579G>T   | p.S193S  | 0.285714 |
| DNAJB9  | 4189   | 37 | g.chr7:108213686G>A  | + | 3  | c.561G>A   | p.Q187Q  | 0.031579 |
| VPS13B  | 157680 | 37 | g.chr8:100789121G>A  | + | 41 | c.7441G>A  | p.V2481I | 0.401274 |
| UNC13B  | 10497  | 37 | g.chr9:35376224T>C   | + | 14 | c.1568T>C  | p.L523P  | 0.04     |
| VPS13A  | 23230  | 37 | g.chr9:79959954G>C   | + | 52 | c.7185G>C  | p.L2395F | 0.387931 |
| SMC2    | 10592  | 37 | g.chr9:106857730G>T  | + | 2  | c.65G>T    | p.G22V   | 0.373333 |
| OR6K6   | 128371 | 37 | g.chr1:158725536T>C  | + | 1  | c.931T>C   | p.F311L  | 0.032258 |
| ENTPD7  | 57089  | 37 | g.chr10:101455868T>C | + | 9  | c.999T>C   | p.L333L  | 0.205479 |
| OR51E1  | 143503 | 37 | g.chr11:46741116C>T  | + | 2  | c.360C>T   | p.A120A  | 0.054054 |
| HEP1L1  | 341208 | 37 | g.chr11:93800809G>A  | + | 5  | c.956G>A   | p.R319Q  | 0.021552 |
| ZNF384  | 171017 | 37 | g.chr12:6781563G>A   | - | 8  | c.1047C>T  | p.Y349Y  | 0.0375   |
| BCDIN3D | 144233 | 37 | g.chr12:50232265G>A  | - | 2  | c.768C>T   | p.D256D  | 0.376471 |
| POTEG   | 404785 | 37 | g.chr14:19553531G>A  | + | 1  | c.115G>A   | p.G39S   | 0.014205 |
| ZFYVE1  | 53349  | 37 | g.chr14:73441537G>A  | - | 10 | c.1937C>T  | p.A646V  | 0.136364 |
| ANP32A  | 8125   | 37 | g.chr15:69080211G>A  | - | 2  | c.102C>T   | p.L34L   | 0.151351 |
| ULK3    | 25989  | 37 | g.chr15:75134497C>A  | - | 3  | c.283G>T   | p.A95S   | 0.02439  |
| MFS6L   | 162387 | 37 | g.chr17:8702136G>A   | - | 1  | c.303C>T   | p.D101D  | 0.319588 |
| ZNF878  | 729747 | 37 | g.chr19:12155673A>C  | - | 5  | c.684T>G   | p.S228R  | 0.017699 |
| ZNF443  | 10224  | 37 | g.chr19:12541141C>T  | - | 4  | c.1845G>A  | p.P615P  | 0.061224 |
| ZNF208  | 7757   | 37 | g.chr19:22155282T>C  | - | 5  | c.2254A>G  | p.K752E  | 0.05     |
| CPXM1   | 56265  | 37 | g.chr20:2775940G>A   | - | 12 | c.1843C>T  | p.L615F  | 0.053571 |
| CHGB    | 1114   | 37 | g.chr20:5903078C>T   | + | 4  | c.288C>T   | p.H96H   | 0.184211 |
| POLR3H  | 171568 | 37 | g.chr22:41928701A>G  | - | 4  | c.257T>C   | p.I86T   | 0.112    |
| CNTN6   | 27255  | 37 | g.chr3:1415346A>G    | + | 15 | c.1845A>G  | p.Q615Q  | 0.075    |
| GFM1    | 85476  | 37 | g.chr3:158366865T>C  | + | 5  | c.608T>C   | p.I203T  | 0.017647 |
| DGKG    | 1608   | 37 | g.chr3:185997721G>A  | - | 9  | c.711C>T   | p.D237D  | 0.019139 |
| PJA2    | 9867   | 37 | g.chr5:108714545G>C  | - | 4  | c.643C>G   | p.L215V  | 0.240385 |
| B4GALT7 | 11285  | 37 | g.chr5:177035977C>T  | + | 5  | c.790C>T   | p.R264W  | 0.029126 |
| LTB     | 4050   | 37 | g.chr6:31548695C>A   | - | 4  | c.526G>T   | p.E176*  | 0.285714 |
| MLXIPL  | 51085  | 37 | g.chr7:73012007C>T   | - | 9  | c.1108G>A  | p.A370T  | 0.384615 |
| NR5A1   | 2516   | 37 | g.chr9:127265482C>T  | - | 3  | c.120G>A   | p.T40T   | 0.6      |
| BRDT    | 676    | 37 | g.chr1:92445196A>G   | + | 8  | c.1169A>G  | p.K390R  | 0.328358 |
| PSRC1   | 84722  | 37 | g.chr1:109823835G>A  | - | 5  | c.558C>T   | p.S186S  | 0.222222 |



|           |        |    |                      |   |    |               |               |          |
|-----------|--------|----|----------------------|---|----|---------------|---------------|----------|
| FLG       | 2312   | 37 | g.chr1:152279722G>A  | - | 3  | c.7640C>T     | p.S2547L      | 0.220532 |
| WAC       | 51322  | 37 | g.chr10:28822958T>G  | + | 2  | c.73T>G       | p.Y25D        | 0.180556 |
| DLG5      | 9231   | 37 | g.chr10:79601670G>A  | - | 7  | c.1406C>T     | p.A469V       | 0.040541 |
| DNMBP     | 23268  | 37 | g.chr10:101646272T>C | - | 13 | c.3403A>G     | p.T1135A      | 0.261905 |
| HIF1AN    | 55662  | 37 | g.chr10:102306957A>G | + | 7  | c.955A>G      | p.M319V       | 0.451613 |
| CCKBR     | 887    | 37 | g.chr11:6291944T>C   | + | 4  | c.722T>C      | p.I241T       | 0.384615 |
| UCP2      | 7351   | 37 | g.chr11:73686556C>T  | - | 7  | c.795G>A      | p.G265G       | 0.134146 |
| KCNA5     | 3741   | 37 | g.chr12:5154819C>T   | + | 1  | c.1506C>T     | p.I502I       | 0.202128 |
| ANO4      | 121601 | 37 | g.chr12:101336184A>G | + | 5  | c.327A>G      | p.G109G       | 0.268657 |
| TEP1      | 7011   | 37 | g.chr14:20840981C>T  | - | 49 | c.6987G>A     | p.S2329S      | 0.0375   |
| MRPL52    | 122704 | 37 | g.chr14:23303430G>A  | + | 5  | c.272G>A      | p.W91*        | 0.22449  |
| DHRS4     | 10901  | 37 | g.chr14:24424420C>T  | + | 2  | c.305C>T      | p.T102M       | 0.1875   |
| BAZ1A     | 11177  | 37 | g.chr14:35245621T>C  | - | 18 | c.2337A>G     | p.K779K       | 0.318182 |
| RPUSD2    | 27079  | 37 | g.chr15:40866379T>G  | + | 3  | c.1557T>G     | p.H519Q       | 0.056604 |
| ARNT2     | 9915   | 37 | g.chr15:80886021T>C  | + | 19 | c.2136T>C     | p.F712F       | 0.272727 |
| OR4F6     | 390648 | 37 | g.chr15:102346447T>C | + | 1  | c.525T>C      | p.D175D       | 0.294118 |
| SPIRE2    | 84501  | 37 | g.chr16:89929977T>C  | + | 11 | c.1669T>C     | p.L557L       | 0.214286 |
| NLK       | 51701  | 37 | g.chr17:26449755T>C  | + | 2  | c.585T>C      | p.D195D       | 0.217391 |
| FOXJ1     | 2302   | 37 | g.chr17:74134121G>T  | - | 2  | c.579C>A      | p.G193G       | 0.103448 |
| ENGASE    | 64772  | 37 | g.chr17:77082094C>T  | + | 14 | c.1895C>T     | p.S632F       | 0.339623 |
| RGPD3     | 653489 | 37 | g.chr2:107041215A>G  | - | 20 | c.3208T>C     | p.F1070L      | 0.197826 |
| C2orf85   | 285093 | 37 | g.chr2:242815069C>G  | + | 2  | c.1362C>G     | p.D454E       | 0.185185 |
| FAM65C    | 140876 | 37 | g.chr20:49218957A>G  | - | 13 | c.1299T>C     | p.G433G       | 0.218182 |
| NUP50     | 10762  | 37 | g.chr22:45580377T>C  | + | 8  | c.1248T>C     | p.C416C       | 0.038961 |
| SETD2     | 29072  | 37 | g.chr3:47155478T>A   | - | 5  | c.4603A>T     | p.N1535Y      | 0.431034 |
| WNT5A     | 7474   | 37 | g.chr3:55504230C>G   | - | 5  | c.1033G>C     | p.D345H       | 0.36     |
| ATG3      | 64422  | 37 | g.chr3:112255428C>T  | - | 10 | c.688G>A      | p.E230K       | 0.191489 |
| ENC1      | 8507   | 37 | g.chr5:73932105C>T   | - | 2  | c.206G>A      | p.R69H        | 0.236364 |
| VAR52     | 57176  | 37 | g.chr6:30893656G>A   | + | 28 | c.2962_splice | p.G988_splice | 0.165217 |
| KIAA1009  | 22832  | 37 | g.chr6:84862443G>A   | - | 23 | c.3450C>T     | p.F1150F      | 0.333333 |
| EPDR1     | 54749  | 37 | g.chr7:37960536A>G   | + | 1  | c.355A>G      | p.T119A       | 0.1875   |
| ZNF107    | 51427  | 37 | g.chr7:64166810A>C   | + | 7  | c.128A>C      | p.Q43P        | 0.16     |
| CNPY4     | 245812 | 37 | g.chr7:99720495A>G   | + | 4  | c.431A>G      | p.E144G       | 0.121212 |
| ZNF212    | 7988   | 37 | g.chr7:148947387G>T  | + | 2  | c.162G>T      | p.K54N        | 0.127273 |
| EXT1      | 2131   | 37 | g.chr8:119122863G>A  | - | 1  | c.423C>T      | p.S141S       | 0.056818 |
| PTK2      | 5747   | 37 | g.chr8:141675072A>C  | - | 31 | c.2890T>G     | p.L964V       | 0.2      |
| KIF24     | 347240 | 37 | g.chr9:34306329A>G   | - | 3  | c.734T>C      | p.I245T       | 0.234568 |
| SETX      | 23064  | 37 | g.chr9:135205342T>C  | - | 10 | c.1643A>G     | p.Q548R       | 0.2      |
| FAM69B    | 138311 | 37 | g.chr9:139617935G>A  | + | 5  | c.1005G>A     | p.E335E       | 0.285714 |
| FAM47C    | 442444 | 37 | g.chrX:37027200A>C   | + | 1  | c.717A>C      | p.P239P       | 0.071429 |
| PRAMEF11  | 440560 | 37 | g.chr1:12887612T>C   | - | 3  | c.245A>G      | p.H82R        | 0.011765 |
| LOC649330 | 649330 | 37 | g.chr1:12907683G>A   | - | 1  | c.460C>T      | p.R154*       | 0.477778 |
| WNT4      | 54361  | 37 | g.chr1:22456168C>T   | - | 2  | c.254G>A      | p.R85Q        | 0.26     |
| IL12RB2   | 3595   | 37 | g.chr1:67861538C>T   | + | 16 | c.2355C>T     | p.P785P       | 0.440945 |
| ITIH2     | 3698   | 37 | g.chr10:7774376G>A   | + | 14 | c.1723G>A     | p.A575T       | 0.086957 |
| ZEB1      | 6935   | 37 | g.chr10:31809668G>A  | + | 7  | c.1405G>A     | p.G469R       | 0.46     |
| GLYAT     | 10249  | 37 | g.chr11:58477426G>A  | - | 6  | c.704C>T      | p.P235L       | 0.097561 |
| SHANK2    | 22941  | 37 | g.chr11:70332483C>T  | - | 21 | c.3915G>A     | p.T1305T      | 0.025    |
| CDON      | 50937  | 37 | g.chr11:125880478C>T | - | 8  | c.1310G>A     | p.R437H       | 0.037736 |
| WNK1      | 65125  | 37 | g.chr12:970329C>G    | + | 7  | c.1771C>G     | p.Q591E       | 0.377049 |
| C12orf53  | 196500 | 37 | g.chr12:6804798G>A   | - | 5  | c.625C>T      | p.R209*       | 0.491228 |
| PDZRN4    | 29951  | 37 | g.chr12:41966407G>T  | + | 10 | c.1229G>T     | p.G410V       | 0.05     |
| CLIP1     | 6249   | 37 | g.chr12:122812709C>T | - | 16 | c.3034G>A     | p.E1012K      | 0.066667 |
| SLC15A4   | 121260 | 37 | g.chr12:129283812G>A | - | 7  | c.1565C>T     | p.T522I       | 0.422222 |
| ACSM2B    | 348158 | 37 | g.chr16:20554459G>A  | - | 12 | c.1407C>T     | p.S469S       | 0.031746 |

|            |        |    |                      |   |    |               |               |          |
|------------|--------|----|----------------------|---|----|---------------|---------------|----------|
| CCDC135    | 84229  | 37 | g.chr16:57732895G>A  | + | 3  | c.337G>A      | p.V113M       | 0.026718 |
| FAM83G     | 644815 | 37 | g.chr17:18880989C>T  | - | 5  | c.1990G>A     | p.G664S       | 0.44     |
| COL1A1     | 1277   | 37 | g.chr17:48268189G>A  | - | 33 | c.2332C>T     | p.P778S       | 0.442308 |
| KIF2B      | 84643  | 37 | g.chr17:51902295T>C  | + | 1  | c.1901T>C     | p.I634T       | 0.042254 |
| OR10H1     | 26539  | 37 | g.chr19:15918805C>T  | - | 1  | c.43G>A       | p.V15I        | 0.206349 |
| OSCAR      | 126014 | 37 | g.chr19:54600278G>A  | - | 4  | c.319C>T      | p.L107L       | 0.034483 |
| LILRA4     | 23547  | 37 | g.chr19:54849455C>G  | - | 4  | c.407G>C      | p.G136A       | 0.04     |
| NLRP11     | 204801 | 37 | g.chr19:56329269C>T  | - | 4  | c.271_splice  | p.R91_splice  | 0.037736 |
| ZFP28      | 140612 | 37 | g.chr19:57066116C>G  | + | 8  | c.1962C>G     | p.F654L       | 0.06     |
| APOB       | 338    | 37 | g.chr2:21250699C>G   | - | 14 | c.2067_splice | p.E689_splice | 0.422222 |
| ATL2       | 64225  | 37 | g.chr2:38527425A>C   | - | 10 | c.1117T>G     | p.S373A       | 0.053763 |
| RGPD3      | 653489 | 37 | g.chr2:107041110C>A  | - | 20 | c.3313G>T     | p.V1105L      | 0.023392 |
| SCTR       | 6344   | 37 | g.chr2:120223390C>T  | - | 5  | c.478G>A      | p.A160T       | 0.164706 |
| TTC30A     | 92104  | 37 | g.chr2:178482772G>A  | - | 1  | c.658C>T      | p.R220C       | 0.06     |
| OXTR       | 5021   | 37 | g.chr3:8794796C>A    | - | 4  | c.1037G>T     | p.C346F       | 0.056604 |
| SLC22A14   | 9389   | 37 | g.chr3:38347529G>A   | + | 2  | c.12G>A       | p.E4E         | 0.032    |
| MUC4       | 4585   | 37 | g.chr3:195505836G>C  | - | 3  | c.12231C>G    | p.H4077Q      | 0.375    |
| ZNF732     | 654254 | 37 | g.chr4:266220C>T     | - | 3  | c.423G>A      | p.Q141Q       | 0.625    |
| DCHS2      | 54798  | 37 | g.chr4:155287395C>T  | - | 5  | c.661G>A      | p.V221M       | 0.392157 |
| CTNND2     | 1501   | 37 | g.chr5:11022928G>A   | - | 17 | c.2952C>T     | p.A984A       | 0.287879 |
| RNF182     | 221687 | 37 | g.chr6:13977813C>T   | + | 3  | c.463C>T      | p.P155S       | 0.027972 |
| PCLO       | 27445  | 37 | g.chr7:82584741C>T   | - | 5  | c.5528G>A     | p.R1843H      | 0.044693 |
| PNOC       | 5368   | 37 | g.chr8:28186731C>T   | + | 2  | c.57C>T       | p.S19S        | 0.473214 |
| TAF1L      | 138474 | 37 | g.chr9:32634312C>A   | - | 1  | c.1266G>T     | p.L422L       | 0.10177  |
| RUSC2      | 9853   | 37 | g.chr9:35547771C>G   | + | 2  | c.1253C>G     | p.T418S       | 0.015385 |
| ZNF462     | 58499  | 37 | g.chr9:109773231C>G  | + | 13 | c.7441C>G     | p.L2481V      | 0.119403 |
| KIF12      | 113220 | 37 | g.chr9:116856721C>T  | - | 9  | c.720G>A      | p.K240K       | 0.531915 |
| FAM47C     | 442444 | 37 | g.chrX:37027156C>G   | + | 1  | c.673C>G      | p.Q225E       | 0.034091 |
| FAM47C     | 442444 | 37 | g.chrX:37027980C>T   | + | 1  | c.1497C>T     | p.C499C       | 0.377551 |
| GPR173     | 54328  | 37 | g.chrX:53106646A>G   | + | 2  | c.843A>G      | p.E281E       | 0.222222 |
| KDM5C      | 8242   | 37 | g.chrX:53239989C>A   | - | 11 | c.1452G>T     | p.Q484H       | 0.270833 |
| IRS4       | 8471   | 37 | g.chrX:107977308G>A  | - | 1  | c.2267C>T     | p.P756L       | 0.043103 |
| ST6GALNAC5 | 81849  | 37 | g.chr1:77510088G>A   | + | 3  | c.461G>A      | p.R154H       | 0.438596 |
| MOV10      | 4343   | 37 | g.chr1:113240682T>G  | + | 15 | c.2265T>G     | p.A755A       | 0.401961 |
| AMPD1      | 270    | 37 | g.chr1:115229470A>C  | - | 4  | c.277T>G      | p.S93A        | 0.375    |
| SELL       | 6402   | 37 | g.chr1:169679608G>A  | - | 2  | c.54C>T       | p.F18F        | 0.777778 |
| ZC3H11A    | 9877   | 37 | g.chr1:203816359A>G  | + | 15 | c.1090A>G     | p.I364V       | 0.447368 |
| SYT14      | 255928 | 37 | g.chr1:210194441C>T  | + | 4  | c.284C>T      | p.A95V        | 0.552239 |
| MYO7A      | 4647   | 37 | g.chr11:76868324G>T  | + | 8  | c.736_splice  | p.A246_splice | 0.5      |
| GDPD4      | 220032 | 37 | g.chr11:76980056C>A  | - | 8  | c.537G>T      | p.M179I       | 0.541667 |
| OR8D4      | 338662 | 37 | g.chr11:123777260G>T | + | 1  | c.122G>T      | p.G41V        | 0.521127 |
| KRT72      | 140807 | 37 | g.chr12:52984637C>T  | - | 6  | c.1072G>A     | p.G358R       | 0.345238 |
| SFRS8      | 6433   | 37 | g.chr12:132199476G>A | + | 3  | c.498G>A      | p.E166E       | 0.029703 |
| MYO16      | 23026  | 37 | g.chr13:109535506G>A | + | 13 | c.1459G>A     | p.E487K       | 0.064935 |
| TUBGCP3    | 10426  | 37 | g.chr13:113143953A>C | - | 21 | c.2507T>G     | p.F836C       | 0.533333 |
| PLD4       | 122618 | 37 | g.chr14:105396438C>T | + | 6  | c.713C>T      | p.T238M       | 0.454545 |
| ZFP106     | 64397  | 37 | g.chr15:42717038G>T  | - | 13 | c.5115C>A     | p.C1705*      | 0.333333 |
| ZFHX3      | 463    | 37 | g.chr16:72829959G>T  | - | 9  | c.6622C>A     | p.P2208T      | 0.319672 |
| SHPK       | 23729  | 37 | g.chr17:3539425G>C   | - | 1  | c.89C>G       | p.S30C        | 0.478261 |
| SIRT7      | 51547  | 37 | g.chr17:79870399C>A  | - | 10 | c.1096G>T     | p.E366*       | 0.5      |
| NFIX       | 4784   | 37 | g.chr19:13192541A>G  | + | 8  | c.1150A>G     | p.I384V       | 0.37037  |
| TBC1D8     | 11138  | 37 | g.chr2:101654956G>A  | - | 7  | c.1197C>T     | p.P399P       | 0.405556 |
| TBR1       | 10716  | 37 | g.chr2:162273318G>T  | + | 1  | c.397G>T      | p.A133S       | 0.467033 |
| TTN        | 7273   | 37 | g.chr2:179621299G>A  | - | 44 | c.10391C>T    | p.T3464I      | 0.048387 |
| KIAA1486   | 57624  | 37 | g.chr2:226447052G>A  | + | 4  | c.919G>A      | p.A307T       | 0.373134 |

|           |        |    |                                 |   |    |                  |               |          |
|-----------|--------|----|---------------------------------|---|----|------------------|---------------|----------|
| PTPRT     | 11122  | 37 | g.chr20:40710653C>T             | - | 30 | c.4141G>A        | p.G1381R      | 0.454545 |
| ZSWIM1    | 90204  | 37 | g.chr20:44512200A>T             | + | 2  | c.969A>T         | p.E323D       | 0.056338 |
| CCR4      | 1233   | 37 | g.chr3:32995658G>A              | + | 2  | c.744G>A         | p.V248V       | 0.382353 |
| DCLK3     | 85443  | 37 | g.chr3:36759633C>T              | - | 4  | c.1621G>A        | p.V541M       | 0.37234  |
| GSTCD     | 79807  | 37 | g.chr4:106647804G>A             | + | 4  | c.963G>A         | p.R321R       | 0.62069  |
| EMB       | 133418 | 37 | g.chr5:49706766A>G              | - | 4  | c.417T>C         | p.S139S       | 0.37037  |
| PCDHAC2   | 56134  | 37 | g.chr5:140347141G>A             | + | 1  | c.790G>A         | p.V264I       | 0.41     |
| RELL2     | 285613 | 37 | g.chr5:141019200G>A             | + | 5  | c.487G>A         | p.V163M       | 0.583333 |
| MTHFD1L   | 25902  | 37 | g.chr6:151293167_151293168AA>GT | + | 20 | c.2098_2099AA>GT | p.K700V       | 0.48     |
| ELN       | 2006   | 37 | g.chr7:73474271T>C              | + | 23 | c.1488T>C        | p.G496G       | 0.104167 |
| ELN       | 2006   | 37 | g.chr7:73474290T>G              | + | 23 | c.1507T>G        | p.L503V       | 0.266667 |
| ELN       | 2006   | 37 | g.chr7:73474307C>T              | + | 23 | c.1524C>T        | p.G508G       | 0.078947 |
| RELN      | 5649   | 37 | g.chr7:103207091C>T             | - | 32 | c.4704G>A        | p.A1568A      | 0.473684 |
| KIAA1549  | 57670  | 37 | g.chr7:138604123T>A             | - | 2  | c.249A>T         | p.K83N        | 0.44898  |
| UBE3C     | 9690   | 37 | g.chr7:157046771C>T             | + | 20 | c.2818C>T        | p.R940C       | 0.5      |
| DLC1      | 10395  | 37 | g.chr8:12957624C>G              | - | 9  | c.2222G>C        | p.S741T       | 0.04     |
| CHD7      | 55636  | 37 | g.chr8:61707573G>A              | + | 4  | c.2125G>A        | p.A709T       | 0.325    |
| UQCRB     | 7381   | 37 | g.chr8:97244053C>A              | - | 3  | c.207G>T         | p.L69L        | 0.346154 |
| GLDC      | 2731   | 37 | g.chr9:6644632T>C               | - | 2  | c.316A>G         | p.K106E       | 0.510204 |
| TAF1L     | 138474 | 37 | g.chr9:32631455G>A              | - | 1  | c.4123C>T        | p.R1375W      | 0.439153 |
| ZCCHC6    | 79670  | 37 | g.chr9:88967826G>A              | - | 2  | c.289C>T         | p.Q97*        | 0.38172  |
| IKBKAP    | 8518   | 37 | g.chr9:111665931A>T             | - | 15 | c.1662T>A        | p.D554E       | 0.444444 |
| PNPLA4    | 8228   | 37 | g.chrX:7894143T>C               | - | 2  | c.18A>G          | p.L6L         | 0.428571 |
| ODZ1      | 10178  | 37 | g.chrX:123518248C>T             | - | 29 | c.6512G>A        | p.R2171H      | 0.457627 |
| LAMB3     | 3914   | 37 | g.chr1:209797286G>A             | - | 14 | c.2036C>T        | p.P679L       | 0.054348 |
| C10orf118 | 55088  | 37 | g.chr10:115917313C>A            | - | 3  | c.759G>T         | p.Q253H       | 0.140351 |
| OR4C16    | 219428 | 37 | g.chr11:55339962G>A             | + | 1  | c.359G>A         | p.R120H       | 0.1875   |
| MS4A6E    | 245802 | 37 | g.chr11:60107369G>T             | + | 3  | c.385G>T         | p.V129L       | 0.2249   |
| SLC12A3   | 6559   | 37 | g.chr16:56926039G>A             | + | 20 | c.2413G>A        | p.A805T       | 0.051724 |
| XIRP2     | 129446 | 37 | g.chr2:168103772C>T             | + | 8  | c.5870C>T        | p.S1957L      | 0.125    |
| KCNH8     | 131096 | 37 | g.chr3:19491797G>T              | + | 9  | c.1575G>T        | p.E525D       | 0.121739 |
| ZNF621    | 285268 | 37 | g.chr3:40574124A>G              | + | 5  | c.863A>G         | p.E288G       | 0.061538 |
| SH3TC2    | 79628  | 37 | g.chr5:148392171G>A             | - | 13 | c.3180C>T        | p.D1060D      | 0.12     |
| PCLO      | 27445  | 37 | g.chr7:82764498T>C              | - | 3  | c.2368A>G        | p.K790E       | 0.064286 |
| ACOT9     | 23597  | 37 | g.chrX:23724801G>A              | - | 10 | c.759C>T         | p.P253P       | 0.101449 |
| ZBTB33    | 10009  | 37 | g.chrX:119388643G>T             | + | 2  | c.1373G>T        | p.R458I       | 0.064815 |
| GPR112    | 139378 | 37 | g.chrX:135431708A>G             | + | 6  | c.5843A>G        | p.N1948S      | 0.25     |
| SOAT2     | 8435   | 37 | g.chr12:53515086G>A             | + | 12 | c.1138_splice    | p.D380_splice | 0.105263 |
| NAB2      | 4665   | 37 | g.chr12:57486733G>A             | + | 4  | c.1125G>A        | p.L375L       | 0.471831 |
| STAT6     | 6778   | 37 | g.chr12:57492604G>A             | - | 18 | c.2037C>T        | p.S679S       | 0.373626 |
| CIT       | 11113  | 37 | g.chr12:120166348G>A            | - | 27 | c.3424C>T        | p.L1142L      | 0.45122  |
| OR4N4     | 283694 | 37 | g.chr15:22332432C>T             | + | 3  | c.-742C>T        |               | 0.053435 |
| CYFIP1    | 23191  | 37 | g.chr15:22928467T>G             | + | 5  | c.344T>G         | p.L115R       | 0.078212 |
| CDH1      | 999    | 37 | g.chr16:68842648A>G             | + | 5  | c.584A>G         | p.Q195R       | 0.101695 |
| CWC25     | 54883  | 37 | g.chr17:36971223A>T             | - | 3  | c.319T>A         | p.C107S       | 0.5      |
| ERN1      | 2081   | 37 | g.chr17:62141429G>A             | - | 10 | c.1004C>T        | p.T335M       | 0.518519 |
| CD7       | 924    | 37 | g.chr17:80274571G>A             | - | 2  | c.369C>T         | p.Y123Y       | 0.086093 |
| TRMT1     | 55621  | 37 | g.chr19:13221056G>A             | - | 7  | c.935C>T         | p.P312L       | 0.512821 |
| C19orf51  | 352909 | 37 | g.chr19:55670703G>A             | - | 12 | c.1353C>T        | p.F451F       | 0.157895 |
| DPP4      | 1803   | 37 | g.chr2:162895527G>C             | - | 7  | c.424C>G         | p.L142V       | 0.04717  |
| KIAA1486  | 57624  | 37 | g.chr2:226447451G>A             | + | 4  | c.1318G>A        | p.V440I       | 0.535714 |
| SIRPB2    | 284759 | 37 | g.chr20:1456924G>A              | - | 5  | c.917C>T         | p.A306V       | 0.11236  |
| TH1L      | 51497  | 37 | g.chr20:57568133A>C             | + | 11 | c.1337A>C        | p.D446A       | 0.472727 |
| ADAMTS1   | 9510   | 37 | g.chr21:28213340G>A             | - | 4  | c.1355C>T        | p.T452I       | 0.468966 |
| DNAH1     | 25981  | 37 | g.chr3:52422507G>A              | + | 58 | c.9245G>A        | p.R3082H      | 0.444444 |

|          |        |    |                                 |   |    |                  |          |          |
|----------|--------|----|---------------------------------|---|----|------------------|----------|----------|
| FAT4     | 79633  | 37 | g.chr4:126372524T>C             | + | 9  | c.10353T>C       | p.G3451G | 0.056962 |
| RP1      | 6101   | 37 | g.chr8:55538622G>T              | + | 4  | c.2180G>T        | p.C727F  | 0.490909 |
| NDRG1    | 10397  | 37 | g.chr8:134262769G>A             | - | 10 | c.612C>T         | p.N204N  | 0.522727 |
| SAGE1    | 55511  | 37 | g.chrX:134990686C>T             | + | 12 | c.1351C>T        | p.R451*  | 0.057971 |
| TSSK3    | 81629  | 37 | g.chr1:32828341C>A              | + | 1  | c.39C>A          | p.G13G   | 0.396552 |
| BLNK     | 29760  | 37 | g.chr10:97956683C>G             | - | 16 | c.1232G>C        | p.R411T  | 0.04902  |
| HCFC2    | 29915  | 37 | g.chr12:104476357A>T            | + | 6  | c.847A>T         | p.T283S  | 0.247191 |
| CDH5     | 1003   | 37 | g.chr16:66434745G>A             | + | 11 | c.1663G>A        | p.V555M  | 0.284211 |
| MAPT     | 4137   | 37 | g.chr17:44091637T>G             | + | 12 | c.1895T>G        | p.L632R  | 0.12     |
| ST8SIA5  | 29906  | 37 | g.chr18:44260231C>T             | - | 7  | c.905G>A         | p.G302D  | 0.115942 |
| LASS4    | 79603  | 37 | g.chr19:8316126T>G              | + | 3  | c.166T>G         | p.F56V   | 0.290323 |
| MUC16    | 94025  | 37 | g.chr19:9085136G>T              | - | 1  | c.6679C>A        | p.P2227T | 0.318182 |
| MAN2B1   | 4125   | 37 | g.chr19:12757478G>A             | - | 24 | c.2992C>T        | p.R998C  | 0.380952 |
| CAPN12   | 147968 | 37 | g.chr19:39225474G>C             | - | 15 | c.1723C>G        | p.L575V  | 0.269231 |
| ASB3     | 51130  | 37 | g.chr2:53927482T>C              | - | 8  | c.1164A>G        | p.Q388Q  | 0.354839 |
| SEMG1    | 6406   | 37 | g.chr20:43836680C>A             | + | 2  | c.742C>A         | p.H248N  | 0.37594  |
| ZNF831   | 128611 | 37 | g.chr20:57769093G>A             | + | 1  | c.3019G>A        | p.D1007N | 0.088235 |
| NT5DC2   | 64943  | 37 | g.chr3:52562087G>A              | - | 7  | c.663C>T         | p.D221D  | 0.5      |
| TNIK     | 23043  | 37 | g.chr3:170784371_170784372AC>TG | - | 31 | c.3852_3853GT>CA | p.S1285T | 0.077922 |
| SH3D19   | 152503 | 37 | g.chr4:152095866G>A             | - | 7  | c.650C>T         | p.S217L  | 0.33526  |
| RXFP1    | 59350  | 37 | g.chr4:159520558T>C             | + | 4  | c.367T>C         | p.S123P  | 0.333333 |
| STK31    | 56164  | 37 | g.chr7:23794080C>A              | + | 10 | c.1280C>A        | p.T427N  | 0.279279 |
| PTPRZ1   | 5803   | 37 | g.chr7:121651157T>C             | + | 12 | c.2057C>T        | p.S686F  | 0.080645 |
| PADI3    | 51702  | 37 | g.chr1:17603108G>A              | + | 12 | c.1402G>A        | p.V468M  | 0.293103 |
| RBM15    | 64783  | 37 | g.chr1:110882560G>A             | + | 1  | c.533G>A         | p.G178E  | 0.333333 |
| ARV1     | 64801  | 37 | g.chr1:231114994A>G             | + | 1  | c.143A>G         | p.Y48C   | 0.5      |
| CALCA    | 796    | 37 | g.chr11:14991524T>C             | - | 3  | c.184A>G         | p.K62E   | 0.427083 |
| CRY2     | 1408   | 37 | g.chr11:45882512T>C             | + | 4  | c.644T>C         | p.M215T  | 0.487179 |
| OR4C13   | 283092 | 37 | g.chr11:49974700C>T             | + | 1  | c.726C>T         | p.I242I  | 0.468927 |
| ATM      | 472    | 37 | g.chr11:108196072T>C            | + | 46 | c.6608T>C        | p.I2203T | 0.507143 |
| C12orf66 | 144577 | 37 | g.chr12:64609516T>C             | - | 2  | c.463A>G         | p.I155V  | 0.6      |
| SERPINA6 | 866    | 37 | g.chr14:94770776C>T             | - | 5  | c.1197G>A        | p.A399A  | 0.072464 |
| CHRFAM7A | 89832  | 37 | g.chr15:30659622C>T             | - | 9  | c.719G>A         | p.W240*  | 0.363636 |
| MEGF11   | 84465  | 37 | g.chr15:66190299A>G             | - | 23 | c.3108T>C        | p.N1036N | 0.535714 |
| TSC2     | 7249   | 37 | g.chr16:2114352C>T              | + | 15 | c.1523C>T        | p.A508V  | 0.076087 |
| ABR      | 29     | 37 | g.chr17:959326C>A               | - | 14 | c.1510G>T        | p.G504C  | 0.380952 |
| IGF2BP1  | 10642  | 37 | g.chr17:47119680G>A             | + | 9  | c.1018G>A        | p.E340K  | 0.469697 |
| ZNF845   | 91664  | 37 | g.chr19:53854397G>C             | + | 4  | c.469G>C         | p.E157Q  | 0.045455 |
| BRSK1    | 84446  | 37 | g.chr19:55805719G>A             | + | 7  | c.632G>A         | p.R211Q  | 0.166667 |
| OGG1     | 4968   | 37 | g.chr3:9793620G>A               | + | 3  | c.552G>A         | p.L184L  | 0.068182 |
| XIRP1    | 165904 | 37 | g.chr3:39228976C>G              | - | 2  | c.1961G>C        | p.G654A  | 0.4375   |
| BSN      | 8927   | 37 | g.chr3:49692992C>G              | + | 5  | c.6003C>G        | p.I2001M | 0.436364 |
| C3orf17  | 25871  | 37 | g.chr3:112738432C>T             | - | 1  | c.63G>A          | p.G21G   | 0.410256 |
| PRPS1L1  | 221823 | 37 | g.chr7:18066671A>G              | - | 1  | c.735T>C         | p.Y245Y  | 0.443182 |
| TAF1L    | 138474 | 37 | g.chr9:32631979C>T              | - | 1  | c.3599G>A        | p.R1200H | 0.03937  |
| LPPR4    | 9890   | 37 | g.chr1:99771502A>G              | + | 7  | c.1228A>G        | p.M410V  | 0.101449 |
| OR2T33   | 391195 | 37 | g.chr1:248436810G>C             | - | 1  | c.307C>G         | p.P103A  | 0.10084  |
| MTPAP    | 55149  | 37 | g.chr10:30611436C>A             | - | 6  | c.1103G>T        | p.S368I  | 0.269841 |
| FAM160A2 | 84067  | 37 | g.chr11:6239142T>C              | - | 9  | c.1674A>G        | p.A558A  | 0.189474 |
| CBL      | 867    | 37 | g.chr11:119148891T>C            | + | 8  | c.1111T>C        | p.Y371H  | 0.204082 |
| SLC01B3  | 28234  | 37 | g.chr12:21028173T>A             | + | 8  | c.732T>A         | p.T244T  | 0.044983 |
| WNT10B   | 7480   | 37 | g.chr12:49359949G>A             | - | 5  | c.1099C>T        | p.R367C  | 0.133333 |
| EEA1     | 8411   | 37 | g.chr12:93221741T>G             | - | 12 | c.1351A>C        | p.K451Q  | 0.189189 |
| MKRN3    | 7681   | 37 | g.chr15:23812196C>T             | + | 1  | c.1267C>T        | p.P423S  | 0.138462 |
| PTH2R    | 5746   | 37 | g.chr2:209358098C>T             | + | 13 | c.1367C>T        | p.T456M  | 0.25     |

|          |        |    |                                 |   |    |                |               |          |
|----------|--------|----|---------------------------------|---|----|----------------|---------------|----------|
| C20orf72 | 92667  | 37 | g.chr20:17968878C>A             | + | 4  | c.801C>A       | p.D267E       | 0.123077 |
| ABI3BP   | 25890  | 37 | g.chr3:100527069C>G             | - | 19 | c.1608G>C      | p.Q536H       | 0.078947 |
| NPHP3    | 27031  | 37 | g.chr3:132432003A>G             | - | 6  | c.1085T>C      | p.L362S       | 0.152174 |
| ARHGAP10 | 79658  | 37 | g.chr4:148786004T>C             | + | 6  | c.494T>C       | p.I165T       | 0.119048 |
| HEATR7B2 | 133558 | 37 | g.chr5:40998203G>A              | - | 42 | c.4709C>T      | p.A1570V      | 0.074419 |
| ZNF366   | 167465 | 37 | g.chr5:71756259G>A              | - | 2  | c.1065C>T      | p.H355H       | 0.071429 |
| KCNN2    | 3781   | 37 | g.chr5:113740315G>T             | + | 3  | c.763G>T       | p.D255Y       | 0.210526 |
| APBB3    | 10307  | 37 | g.chr5:139941715C>T             | - | 6  | c.596G>A       | p.R199H       | 0.09434  |
| PCDHA5   | 56143  | 37 | g.chr5:140203019C>T             | + | 1  | c.1659C>T      | p.F553F       | 0.19708  |
| BAI3     | 577    | 37 | g.chr6:70048813T>G              | + | 25 | c.3194T>G      | p.M1065R      | 0.063205 |
| DOPEY1   | 23033  | 37 | g.chr6:83818692G>T              | + | 5  | c.384G>T       | p.L128F       | 0.109677 |
| TEX10    | 54881  | 37 | g.chr9:103092392A>G             | - | 6  | c.1310T>C      | p.L437P       | 0.171642 |
| PCDH11Y  | 83259  | 37 | g.chrY:5605924C>T               | + | 5  | c.3964C>T      | p.R1322C      | 0.078947 |
| ST7L     | 54879  | 37 | g.chr1:113161707G>A             | - | 1  | c.29C>T        | p.A10V        | 0.090909 |
| KIRREL   | 55243  | 37 | g.chr1:158045965G>A             | + | 2  | c.115G>A       | p.V39M        | 0.048544 |
| KIAA1614 | 57710  | 37 | g.chr1:180907749C>T             | + | 6  | c.2820C>T      | p.I940I       | 0.1      |
| LGI1     | 9211   | 37 | g.chr10:95557306C>T             | + | 8  | c.1420C>T      | p.R474*       | 0.076923 |
| OR4A47   | 403253 | 37 | g.chr11:48510470C>T             | + | 1  | c.126C>T       | p.L42L        | 0.060606 |
| OR4D6    | 219983 | 37 | g.chr11:59225211C>T             | + | 1  | c.778C>T       | p.R260W       | 0.453901 |
| TSGA101P | 254187 | 37 | g.chr11:65721135C>A             | + | 7  | c.1249C>A      | p.H417N       | 0.4      |
| CAPN5    | 726    | 37 | g.chr11:76795988 76795989AC>TG  | + | 2  | c.56 57AC>TG   | p.D19V        | 0.238095 |
| KRT80    | 144501 | 37 | g.chr12:52566110G>A             | - | 7  | c.1050C>T      | p.A350A       | 0.123894 |
| SUPT16H  | 11198  | 37 | g.chr14:21826502C>G             | - | 20 | c.2386G>C      | p.E796Q       | 0.381579 |
| DSG1     | 1828   | 37 | g.chr18:28923517G>A             | + | 12 | c.1792G>A      | p.A598T       | 0.078261 |
| SPPL2B   | 56928  | 37 | g.chr19:2353079C>G              | + | 16 | c.1651C>G      | p.P551A       | 0.366667 |
| ZNF814   | 730051 | 37 | g.chr19:58385546G>T             | - | 3  | c.1212C>A      | p.D404E       | 0.25     |
| POTEF    | 728378 | 37 | g.chr2:130832810C>T             | - | 17 | c.2235G>A      | p.G745G       | 0.09322  |
| KIAA1715 | 80856  | 37 | g.chr2:176802120G>A             | - | 12 | c.1006C>T      | p.P336S       | 0.058824 |
| ANKAR    | 150709 | 37 | g.chr2:190541613C>T             | + | 1  | c.184C>T       | p.Q62*        | 0.122951 |
| NCL      | 4691   | 37 | g.chr2:232320315T>C             | - | 13 | c.1853A>G      | p.N618S       | 0.431373 |
| USP49    | 25862  | 37 | g.chr6:41771694G>C              | - | 5  | c.1411C>G      | p.L471V       | 0.122449 |
| TMEM195  | 392636 | 37 | g.chr7:15425185G>C              | - | 10 | c.960C>G       | p.V320V       | 0.08547  |
| ATP7A    | 538    | 37 | g.chrX:77254160C>T              | + | 5  | c.1522C>T      | p.R508W       | 0.4      |
| CLSPN    | 63967  | 37 | g.chr1:36203608C>T              | - | 22 | c.3649G>A      | p.A1217T      | 0.403509 |
| NBPF9    | 400818 | 37 | g.chr1:144815953A>G             | + | 12 | c.1324A>G      | p.N442D       | 0.056911 |
| KRTAP5-4 | 387267 | 37 | g.chr11:1643228G>A              | - | 1  | c.54C>T        | p.G18G        | 0.109375 |
| MYO5C    | 55930  | 37 | g.chr15:52504010G>A             | - | 35 | c.4213C>T      | p.R1405C      | 0.142857 |
| QPRT     | 23475  | 37 | g.chr16:29706106G>A             | + | 2  | c.135G>A       | p.A45A        | 0.065217 |
| NFATC3   | 4775   | 37 | g.chr16:68225638C>T             | + | 9  | c.3066C>T      | p.N1022N      | 0.057803 |
| KRT26    | 353288 | 37 | g.chr17:38928008C>T             | - | 1  | c.358G>A       | p.E120K       | 0.083333 |
| BZRAP1   | 9256   | 37 | g.chr17:56386538C>T             | - | 22 | c.4095G>A      | p.L1365L      | 0.369863 |
| KLF1     | 10661  | 37 | g.chr19:12997882C>T             | - | 1  | c.73G>A        | p.D25N        | 0.153846 |
| OR10H3   | 26532  | 37 | g.chr19:15852438C>G             | + | 1  | c.236C>G       | p.T79S        | 0.244776 |
| ZFP42    | 132625 | 37 | g.chr4:188924186C>T             | + | 3  | c.225C>T       | p.C75C        | 0.433962 |
| RFX6     | 222546 | 37 | g.chr6:117198968T>A             | + | 2  | c.233T>A       | p.L78*        | 0.351852 |
| STX7     | 8417   | 37 | g.chr6:132791751C>G             | - | 6  | c.402G>C       | p.E134D       | 0.096    |
| AKAP12   | 9590   | 37 | g.chr6:151671760A>G             | + | 4  | c.2234A>G      | p.E745G       | 0.367347 |
| RAB2A    | 5862   | 37 | g.chr8:61496786G>A              | + | 4  | c.206G>A       | p.R69H        | 0.447368 |
| STOM     | 2040   | 37 | g.chr9:124111399T>A             | - | 5  | c.524A>T       | p.Q175L       | 0.2      |
| SF3A2    | 8175   | 37 | g.chr19:2248458delC             | + | 9  | c.1308delC     | p.H436fs      | 0.33     |
| SLC20A1  | 6574   | 37 | g.chr2:113416607 113416608delAG | + | 7  | c.984 985delAG | p.P328fs      | 0.12     |
| SETD2    | 29072  | 37 | g.chr3:47164513delC             | - | 3  | c.1613delG     | p.G538fs      | 0.18     |
| ANLN     | 54443  | 37 | g.chr7:36455435delA             | + | 8  | c.1464delA     | p.V488fs      | 0.34     |
| PRSS22   | 64063  | 37 | g.chr16:2908034 2908036delCAG   | - | 1  | c.70 72delCTG  | p.L24del      | 0.33     |
| NPEPPS   | 9520   | 37 | g.chr17:45669428 45669429insA   | + | 11 | c.1365_splice  | p.K455_splice | 0.32     |

|          |        |    |                                              |   |    |                               |                |      |
|----------|--------|----|----------------------------------------------|---|----|-------------------------------|----------------|------|
| ALPP     | 250    | 37 | g.chr2:233243529_233243531delTGC             | + | 1  | c.17_19delTGC                 | p.L13del       | 0.11 |
| CCDC96   | 257236 | 37 | g.chr4:7044507_7044509delCTC                 | - | 1  | c.157_159delGAG               | p.E53del       | 0.5  |
| TRPV5    | 56302  | 37 | g.chr7:142625819delG                         | - | 6  | c.729delC                     | p.P243fs       | 0.24 |
| APBA1    | 320    | 37 | g.chr9:72082865delG                          | - | 5  | c.1356delC                    | p.P452fs       | 0.41 |
| GRIN1    | 2902   | 37 | g.chr9:140056884_140056886delGAG             | + | 13 | c.1780_1782delGAG             | p.E598del      | 0.08 |
| BHLHB9   | 80823  | 37 | g.chrX:102004419_102004421delGAG             | + | 4  | c.496_498delGAG               | p.E171del      | 0.07 |
| UTY      | 7404   | 37 | g.chrY:15448217_15448218insA                 | - | 16 | c.1771_splice                 | p.G591_splice  | 0.57 |
| CD3G     | 917    | 37 | g.chr11:118220583delA                        | + | 3  | c.205delA                     | p.K69fs        | 0.05 |
| SLC24A1  | 9187   | 37 | g.chr15:65918177_65918179delCTG              | + | 2  | c.1759_1761delCTG             | p.L591del      | 0.06 |
| NANOS3   | 342977 | 37 | g.chr19:13988575_13988577delAGC              | + | 1  | c.513_515delAGC               | p.A172del      | 0.33 |
| RBPJ     | 3516   | 37 | g.chr4:26417145_26417146insA                 | + | 5  | c.243_244insA                 | p.K81fs        | 0.07 |
| SLC17A2  | 10246  | 37 | g.chr6:25921520delT                          | - | 3  | c.361delA                     | p.M121fs       | 0.06 |
| PRB2     | 653247 | 37 | g.chr12:11546732_11546733insAGA              | - | 3  | c.279_280insTCT               | p.93_94insS    | 0.02 |
| CHD2     | 1106   | 37 | g.chr15:93540315_93540316insA                | + | 29 | c.3724_3725insA               | p.E1242fs      | 0.1  |
| FXR2     | 9513   | 37 | g.chr17:7517826delC                          | - | 1  | c.25delG                      | p.D9fs         | 0.33 |
| TBKBP1   | 9755   | 37 | g.chr17:45786123_45786124insC                | + | 8  | c.1024_1025insC               | p.S342fs       | 0.33 |
| GOLGA2   | 2801   | 37 | g.chr9:131019390delA                         | - | 26 | c.2965delT                    | p.Y989fs       | 0.04 |
| CNNM1    | 26507  | 37 | g.chr10:101089768delC                        | + | 1  | c.624delC                     | p.R208fs       | 0.33 |
| HOXB2    | 3212   | 37 | g.chr17:46622130_46622132delAGG              | - | 1  | c.142_144delCCT               | p.P48del       | 0.06 |
| LYPD3    | 27076  | 37 | g.chr19:43969653_43969655delAGC              | - | 1  | c.69_71delGCT                 | p.23_24LL>L    | 0.03 |
| MMRN1    | 22915  | 37 | g.chr4:90844391_90844393delAGC               | + | 4  | c.923_925delAGC               | p.Q313del      | 0.02 |
| G3BP1    | 10146  | 37 | g.chr5:151173719delG                         | + | 5  | c.352_splice                  | p.G118_splice  | 0.37 |
| KLF10    | 7071   | 37 | g.chr8:103664245_103664246delTT              | - | 3  | c.314_315delAA                | p.Q105fs       | 0.51 |
| GABBR2   | 9568   | 37 | g.chr9:101151274delG                         | - | 10 | c.1391delC                    | p.P464fs       | 0.2  |
| TIE1     | 7075   | 37 | g.chr1:43782873_43782875delGAG               | + | 15 | c.2413_2415delGAG             | p.E806del      | 0.3  |
| SLAMF1   | 6504   | 37 | g.chr1:160589600_160589601insT               | - | 5  | c.829_830insA                 | p.S277fs       | 0.05 |
| PDE3A    | 5139   | 37 | g.chr12:20803536_20803537insA                | + | 14 | c.2925_splice                 | p.Q975_splice  | 0.11 |
| PPP1R1C  | 151242 | 37 | g.chr2:182981975_182981977delGAA             | + | 5  | c.283_285delGAA               | p.E98del       | 0.33 |
| FRYL     | 285527 | 37 | g.chr4:48544039_48544042delCTTA              | - | 45 | c.5687_splice                 | p.Q1896_splice | 0.2  |
| ANXA13   | 312    | 37 | g.chr8:124707762delT                         | - | 6  | c.451delA                     | p.I151fs       | 0.04 |
| ZNF609   | 23060  | 37 | g.chr15:64972995_64972997delCAC              | + | 7  | c.4096_4098delCAC             | p.H1371del     | 0.03 |
| LPCAT2   | 54947  | 37 | g.chr16:55566753delG                         | + | 6  | c.721delG                     | p.V241fs       | 0.19 |
| KLHL38   | 340359 | 37 | g.chr8:124659179delC                         | - | 2  | c.1426delG                    | p.V476fs       | 0.12 |
| KIAA1462 | 57608  | 37 | g.chr10:30316501_30316503delCTG              | - | 2  | c.2574_2576delCAG             | p.858_859SS>S  | 0.09 |
| PLIN5    | 440503 | 37 | g.chr19:4523962delC                          | - | 8  | c.970delG                     | p.D324fs       | 0.33 |
| C2orf71  | 388939 | 37 | g.chr2:29295647_29295649delTCC               | - | 1  | c.1479_1481delGGA             | p.493_494EE>E  | 0.04 |
| TXNDC6   | 347736 | 37 | g.chr3:138033173delC                         | - | 6  | c.460_splice                  | p.V154_splice  | 0.37 |
| LRRC66   | 339977 | 37 | g.chr4:52883766delT                          | - | 1  | c.14delA                      | p.Y5fs         | 0.35 |
| ARMCX3   | 51566  | 37 | g.chrX:100880152_100880154delTGA             | + | 5  | c.183_185delTGA               | p.D66del       | 0.02 |
| AJAP1    | 55966  | 37 | g.chr1:4772583_4772585delCCA                 | + | 2  | c.653_655delCCA               | p.T225del      | 0.33 |
| HCFC2    | 29915  | 37 | g.chr12:104481762delA                        | + | 9  | c.1232_splice                 | p.G411_splice  | 0.46 |
| SACS     | 26278  | 37 | g.chr13:23910010_23910025delCTCTAAACATGCGTCC | - | 10 | c.7990_8005delGGACGCATGTTAGAG | p.G2664fs      | 0.4  |
| FAM155A  | 728215 | 37 | g.chr13:108518338delC                        | - | 1  | c.607delG                     | p.D203fs       | 0.03 |
| STX8     | 9482   | 37 | g.chr17:9408350_9408359delAGTACCTTGG         | - | 5  | c.448_splice                  | p.E150_splice  | 0.16 |
| NPEPPS   | 9520   | 37 | g.chr17:45669428_45669429insA                | + | 11 | c.1365_splice                 | p.K455_splice  | 0.24 |
| PSMA7    | 5688   | 37 | g.chr20:60715953delC                         | - | 2  | c.144delG                     | p.K48fs        | 0.41 |
| DTX3L    | 151636 | 37 | g.chr3:122283372_122283383delTAAGTCTCGGG     | + | 1  | c.99_110delTAAGTCTCGGG        | p.KSSG34del    | 0.16 |
| VEPH1    | 79674  | 37 | g.chr3:157081226_157081227insT               | - | 9  | c.1661_1662insA               | p.N554fs       | 0.04 |
| GOT1L1   | 137362 | 37 | g.chr8:37791833_37791834insT                 | - | 9  | c.1243_1244insA               | p.T415fs       | 0.09 |
| ACSL3    | 2181   | 37 | g.chr2:223781198_223781199insA               | + | 5  | c.540_541insA                 | p.F180fs       | 0.11 |
| ULK4     | 54986  | 37 | g.chr3:41860984_41860985insT                 | - | 19 | c.1778_1779insA               | p.K593fs       | 0.09 |
| TPTE     | 7179   | 37 | g.chr21:10944697delA                         | - | 11 | c.537delT                     | p.F179fs       | 0.02 |
| MTMR14   | 64419  | 37 | g.chr3:9739546_9739549delTGTC                | + | 18 | c.1765_1768delTGTC            | p.C589fs       | 0.18 |
| FRG1     | 2483   | 37 | g.chr4:190873437_190873439delAAG             | + | 3  | c.254_256delAAG               | p.E86del       | 0.03 |
| KIAA1009 | 22832  | 37 | g.chr6:84896233delA                          | - | 12 | c.1218delT                    | p.F406fs       | 0.03 |

|        |        |    |                                 |   |    |                   |                 |      |
|--------|--------|----|---------------------------------|---|----|-------------------|-----------------|------|
| COL1A1 | 1277   | 37 | g.chr17:48270191_48270192insC   | - | 27 | c.1841_1842insG   | p.G614fs        | 0.27 |
| ADH1B  | 125    | 37 | g.chr4:100237419delT            | - | 4  | c.300delA         | p.K100fs        | 0.4  |
| NKTR   | 4820   | 37 | g.chr3:42679035_42679036insC    | + | 13 | c.1839_1840insC   | p.S613fs        | 0.02 |
| ANGPT2 | 285    | 37 | g.chr8:6378797_6378798insT      | - | 4  | c.700_701insA     | p.I234fs        | 0.05 |
| RBPJ   | 3516   | 37 | g.chr4:26417145_26417146insA    | + | 5  | c.243_244insA     | p.K81fs         | 0.03 |
| PRDM12 | 59335  | 37 | g.chr9:133543701_133543702delGT | + | 3  | c.570_splice      | p.E190_splice   | 0.12 |
| H1FOO  | 132243 | 37 | g.chr3:129268110_129268111insA  | + | 3  | c.645_646insA     | p.R215fs        | 0.33 |
| CHD7   | 55636  | 37 | q.chr8:61769038_61769040delGGA  | + | 34 | c.7199_7201delGGA | p.2400_2401RR>R | 0.21 |

Supplementary Table 4: dRanger fusion results

| individual | chr of first partner | strand (partner 1) | chr coordinates of first partner | chr of second partner | strand (partner 2) | chr coordinates of second partner | class      | span (nts) | # reads in tumor | # reads in normal | gene 1         | site 1                                  | gene 2         | site 2                                                | predicted fusion         | BResult |
|------------|----------------------|--------------------|----------------------------------|-----------------------|--------------------|-----------------------------------|------------|------------|------------------|-------------------|----------------|-----------------------------------------|----------------|-------------------------------------------------------|--------------------------|---------|
| SFT35      | 12                   | 0                  | 57486880                         | 12                    | 0                  | 57509206                          | inversion  | 22332      | 6                | 0                 | <i>NAB2</i>    | Exon 5 of NAB2(+)                       | <i>STAT6</i>   | 4.0 kb from <i>STAT6</i> (-) transcription start site | -                        | 1*      |
|            | 6                    | 1                  | 151358108                        | 11                    | 1                  | 18892699                          | inter_chr  | NaN        | 5                | 0                 | <i>MTHFD1L</i> | Exon 26 of MTHFD1L(+)                   | <i>MRGPRX1</i> | IGR: 63Kb before MRGPRX1(-)                           | -                        | 0       |
|            | 11                   | 1                  | 117167586                        | 11                    | 0                  | 131750892                         | long_range | 14583310   | 5                | 0                 | <i>BACE1</i>   | Intron of BACE1(-): 3bp after exon 2    | <i>NTM</i>     | Intron of NTM(+): 31Kb before exon 2                  | Antisense fusion         | 1       |
| SFT38      | 17                   | 1                  | 39619088                         | 17                    | 0                  | 39633854                          | tandem_dup | 14766      | 5                | 0                 | <i>KRT32</i>   | Exon 6 of KRT32(-)                      | <i>KRT35</i>   | Exon 6 of KRT35(-)                                    | Protein fusion: mid-     | 0       |
| SFT40      | 12                   | 1                  | 57486902                         | 12                    | 1                  | 57510439                          | inversion  | 23538      | 11               | 0                 | <i>NAB2</i>    | Exon 5 of NAB2(+)                       | <i>STAT6</i>   | 5.2 kb from <i>STAT6</i> (-) transcription start site | -                        | 1*      |
|            | 20                   | 0                  | 1559360                          | 20                    | 0                  | 1895757                           | inversion  | 336397     | 6                | 0                 | <i>SIRPB1</i>  | Intron of SIRPB1(-): 20bp before exon 2 | <i>SIRPA</i>   | Exon 3 of SIRPA(+)                                    | Protein fusion: mid-     | 0       |
|            | 12                   | 0                  | 57486907                         | 12                    | 0                  | 57510439                          | inversion  | 23577      | 4                | 0                 | <i>NAB2</i>    | Exon 5 of NAB2(+)                       | <i>STAT6</i>   | 5.2 kb from <i>STAT6</i> (-) transcription start site | -                        | 1*      |
| SFT46      | 7                    | 1                  | 142124497                        | 7                     | 0                  | 142162351                         | tandem_dup | 37854      | 4                | 0                 | <i>TRYX3</i>   | IGR: 173Kb before TRYX3(-)              | <i>TRYX3</i>   | IGR: 210Kb before TRYX3(-)                            | -                        | 0       |
| SFT48      | 12                   | 1                  | 57486924                         | 12                    | 1                  | 57507668                          | inversion  | 20744      | 8                | 0                 | <i>NAB2</i>    | Exon 5 of NAB2(+)                       | <i>STAT6</i>   | 2.5 kb from <i>STAT6</i> (-) transcription start site | Protein fusion: mid-     | 1*      |
|            | 12                   | 0                  | 57486925                         | 12                    | 0                  | 57507666                          | inversion  | 20721      | 6                | 0                 | <i>NAB2</i>    | Exon 5 of NAB2(+)                       | <i>STAT6</i>   | 2.5 kb from <i>STAT6</i> (-) transcription start site | Protein fusion: mid-     | 1*      |
| TB-1569    | 12                   | 0                  | 57487019                         | 12                    | 0                  | 57493334                          | inversion  | 6320       | 11               | 0                 | <i>NAB2</i>    | Intron of NAB2(+): 40bp after exon 5    | <i>STAT6</i>   | Intron of <i>STAT6</i> (-): 115bp before exon 16      | Protein fusion: in       | 1*      |
| TB-5309    | 19                   | 1                  | 54783495                         | 19                    | 1                  | 55175600                          | inversion  | 392105     | 7                | 0                 | <i>LILRB2</i>  | Exon 5 of LILRB2(-)                     | <i>LILRB4</i>  | Intron of LILRB4(+): 37bp before exon 4               | Protein fusion: mid-     | 0       |
| TB-5852    | 12                   | 0                  | 57486740                         | 12                    | 0                  | 57501443                          | inversion  | 14701      | 7                | 0                 | <i>NAB2</i>    | Exon 4 of NAB2(+)                       | <i>STAT6</i>   | Exon 3 of <i>STAT6</i> (-)                            | Protein fusion: mid-     | 1*      |
| TB-8115    | 12                   | 1                  | 57486777                         | 12                    | 1                  | 57506957                          | inversion  | 20184      | 13               | 0                 | <i>NAB2</i>    | Intron of NAB2(+): 18bp after exon 4    | <i>STAT6</i>   | 1.8 kb from <i>STAT6</i> (-) transcription start site | Transcript fusion        | 1*      |
|            | 12                   | 0                  | 57486775                         | 12                    | 0                  | 57506958                          | inversion  | 20197      | 13               | 0                 | <i>NAB2</i>    | Intron of NAB2(+): 16bp after exon 4    | <i>STAT6</i>   | 1.8 kb from <i>STAT6</i> (-) transcription start site | Transcript fusion (NAB2) | 1*      |
| TB-9344    | 12                   | 0                  | 57486867                         | 12                    | 0                  | 57510088                          | inversion  | 23217      | 5                | 0                 | <i>NAB2</i>    | Exon 5 of NAB2(+)                       | <i>STAT6</i>   | 4.9 kb from <i>STAT6</i> (-) transcription start site | -                        | 1*      |
|            | 8                    | 0                  | 117655583                        | 8                     | 1                  | 117782526                         | deletion   | 126953     | 4                | 0                 | <i>EIF3H</i>   | IGR: 1Kb before EIF3H(-)                | <i>UTP23</i>   | Exon 2 of UTP23(+)                                    | -                        | 1       |

BP: Breakpointer algorithm. 1=positive (read identified that crosses the breakpoint); 0=negative  
 \*NAB2-STAT6 fusion



**Supplementary Table 5: Primer Sequences**

| Primer_name   | Primer_sequence                                 |
|---------------|-------------------------------------------------|
| SFT40_NAB2F   | <b>TGTAAAACGACGGCCAGT</b> AAGAAGCTGGGAGGCCCTCCA |
| SFT_40_STAT6R | <b>CAGGAAACAGCTATGAC</b> ATCTCCACCCTCCTGCTCTG   |
| SFT_48_NAB2F  | <b>TGTAAAACGACGGCCAGT</b> TGCATATAGGGGCACTGGGC  |
| SFT_48_STAT6R | <b>CAGGAAACAGCTATGAC</b> ACTGTATCACCCCTCCCCTGG  |
| NAB2F1        | <b>TGTAAAACGACGGCCAGT</b> GCACGAGCTCACCATCAACG  |
| STAT6R1       | <b>CAGGAAACAGCTATGAC</b> AAGATGCCGCAGGTGTTGGG   |
| NAB2F2        | <b>TGTAAAACGACGGCCAGT</b> GCCCGAGAGAGCACCTACTT  |
| STAT6R1       | <b>CAGGAAACAGCTATGAC</b> ACATAGAGCCGCTGCACTTT   |
| GAPDH_F       | GAGTCAACGGATTTGGTCGT                            |
| GAPDH_R       | TTGATTTTGGAGGGATCTCG                            |

M13 tags are boldfaced

## Supplementary Information

### References

1. Barbieri, C.E. *et al. Nat Genet* **44**, 685-9 (2012).
2. Stransky, N. *et al. Science* **333**, 1157-60 (2011).
3. Chapman, M.A. *et al. Nature* **471**, 467-72 (2011).
4. Reich, M. *et al. Nat Genet* **38**, 500-1 (2006).
5. TCGA. *Nature* **474**, 609-15 (2011).
6. Hammerman, P.S. *et al. Nature* (2012).
7. Pugh, T.J. *et al. Nature* **488**, 106-10 (2012).
